# Supplementary material for: Easy and efficient one-pot synthesis of pyrazolo[1,5-c]quinazolines under mild copper-catalyzed conditions
Source: Royal Society of Chemistry journal article supplement (doi:10.1039/c2ra21929h), 2012-01-01

## Supporting Information

### Easy and Efficient One-Pot Synthesis of Pyrazolo[1,5-*c*]quinazolines under Mild Copper-Catalyzed Conditions

Xiaobo Yang,<sup>a</sup> Yibao Jin,<sup>b</sup> Hongxia Liu,<sup>b</sup> Yuyang Jiang<sup>b</sup> and Hua Fu<sup>\*a,b</sup>

<sup>a</sup> Key Laboratory of Bioorganic Phosphorus Chemistry and Chemical Biology (Ministry of Education), Department of Chemistry, Tsinghua University, Beijing 100084, P. R. China

<sup>b</sup> Key Laboratory of Chemical Biology (Guangdong Province), Graduate School of Shenzhen, Tsinghua University, Shenzhen 518057, P. R. China

Email: fuhua@mail.tsinghua.edu.cn; Fax : 86-10-62781695

\* To whom correspondence should be addressed.

The  $^1\text{H}$  and  $^{13}\text{C}$  NMR spectra of compounds **3a-v** and **1a**

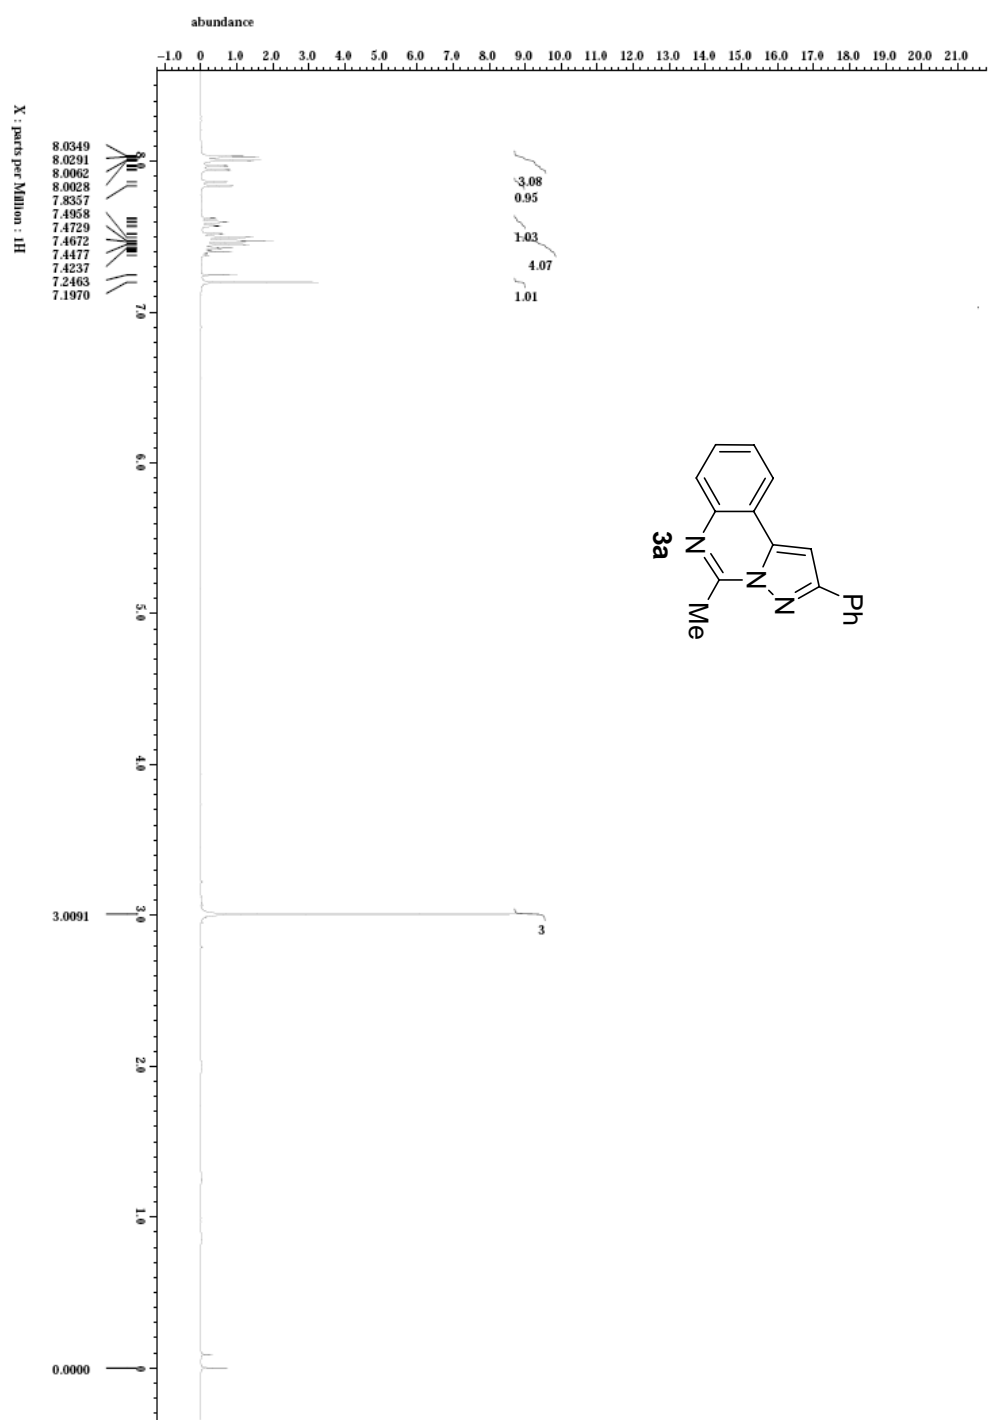

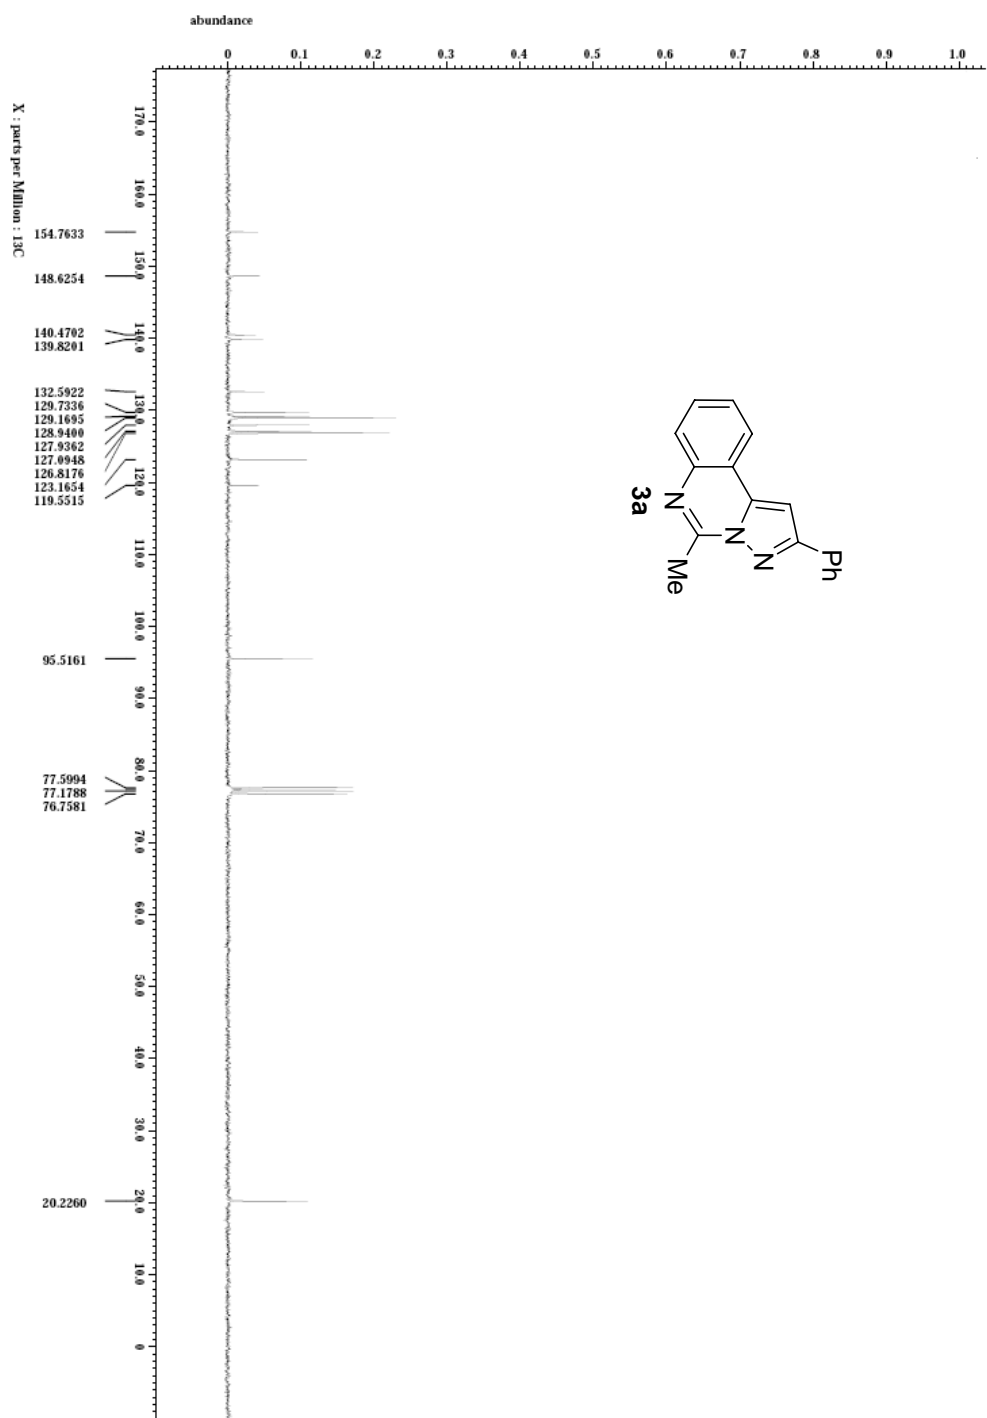

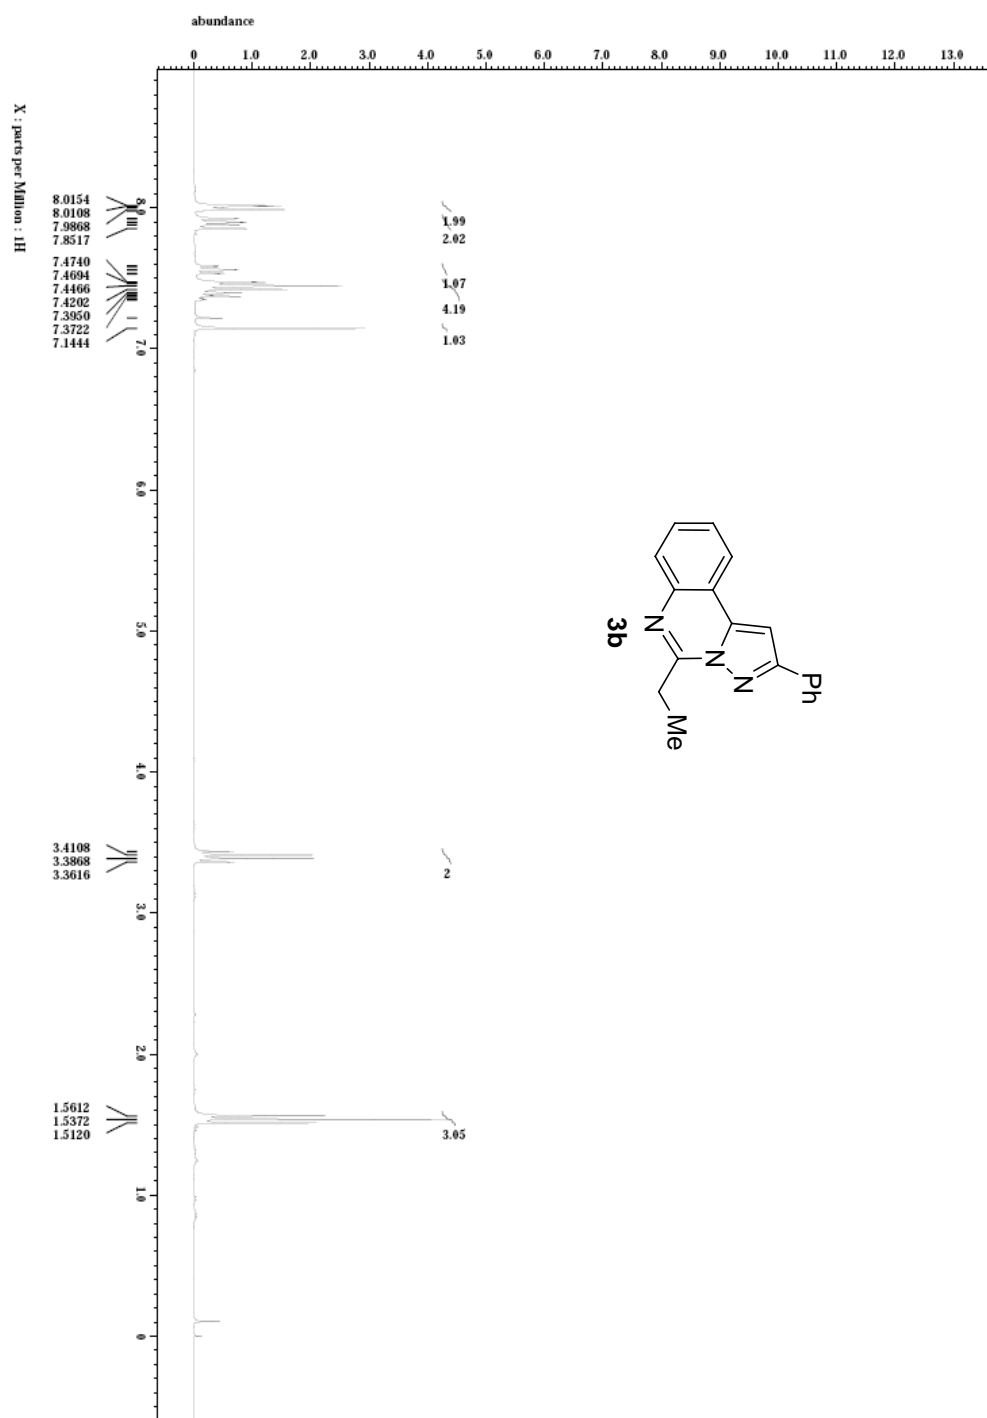

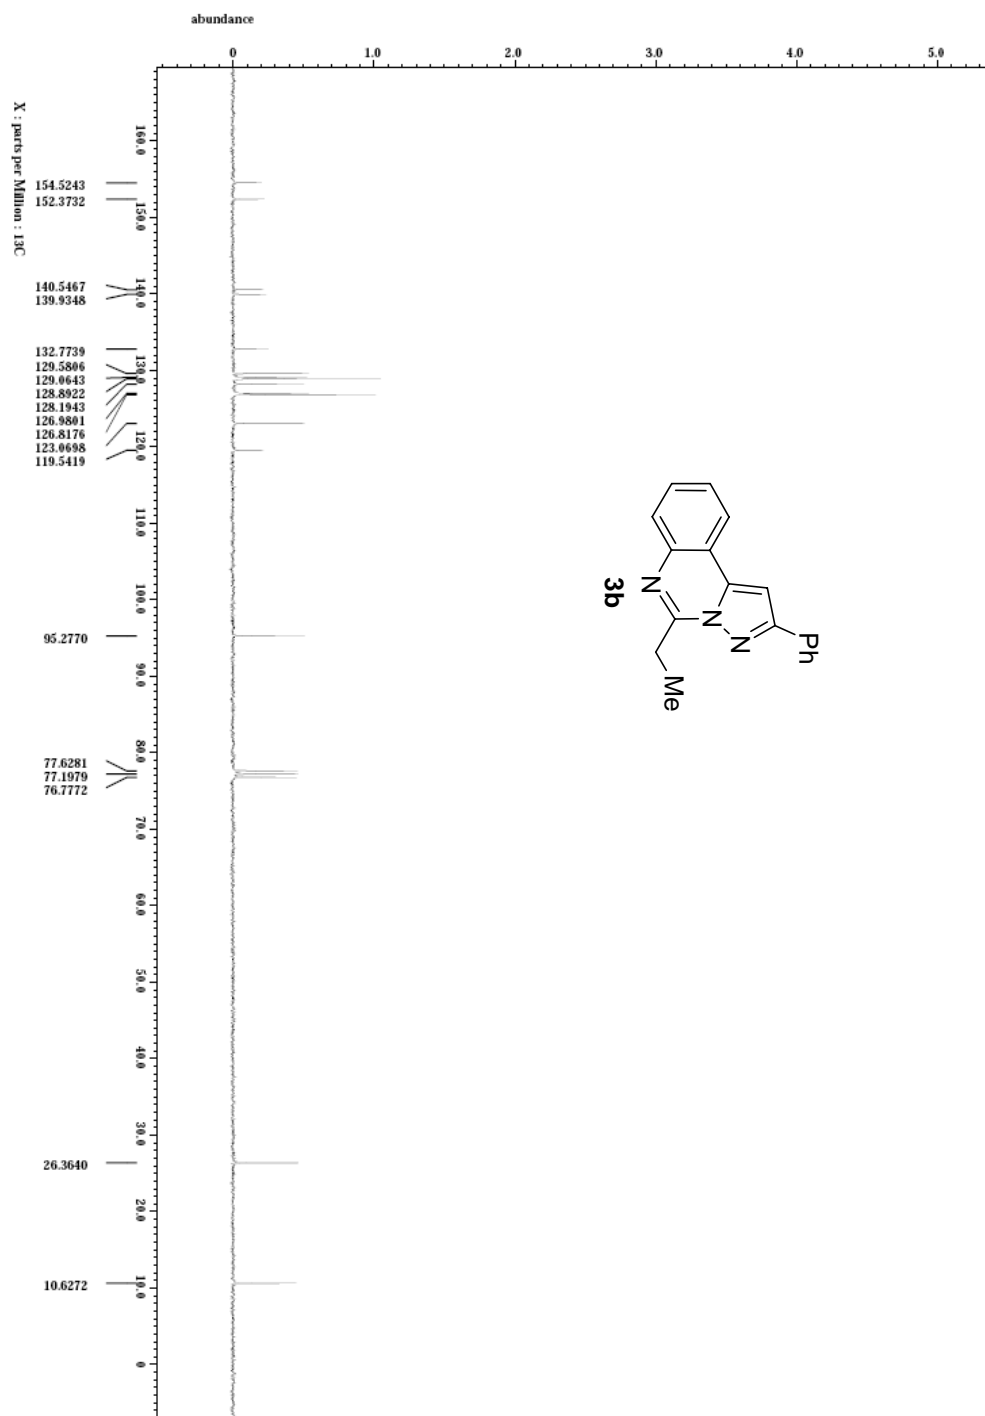

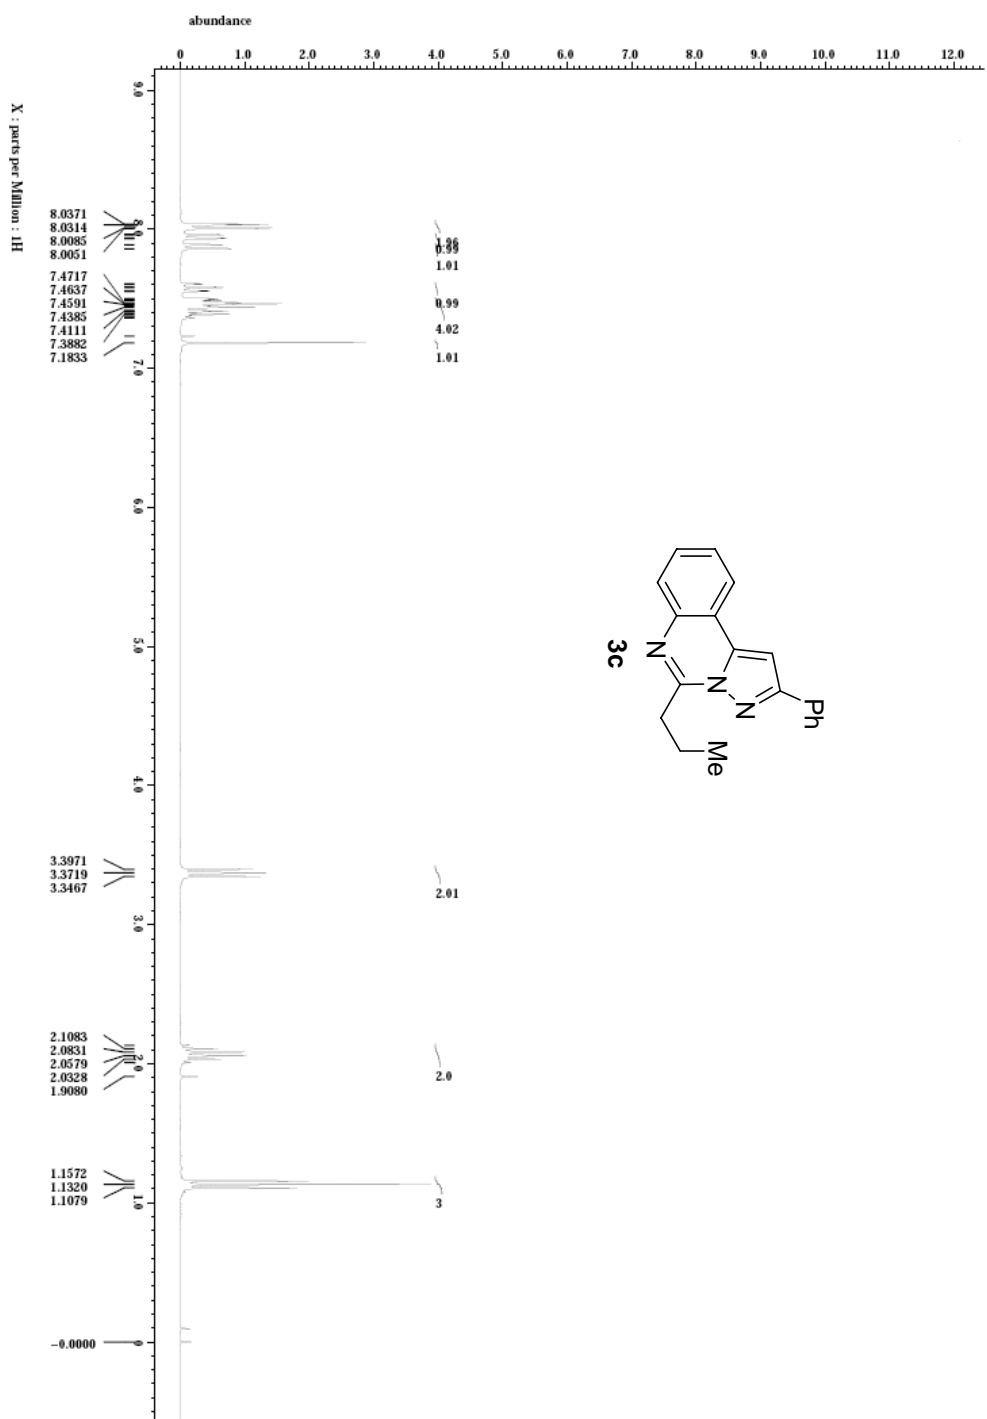

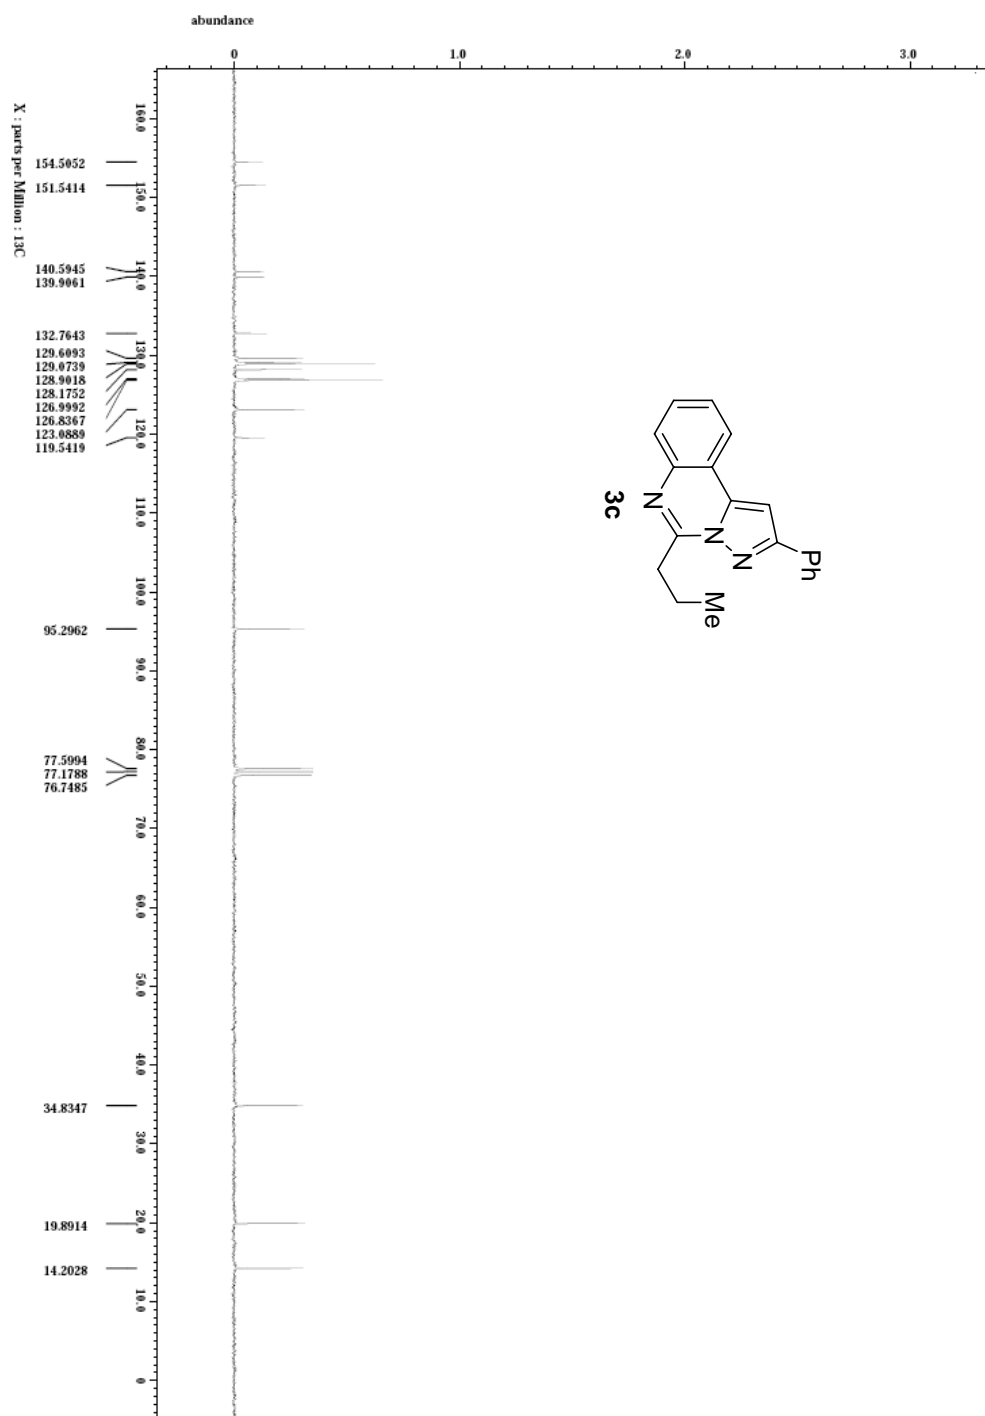

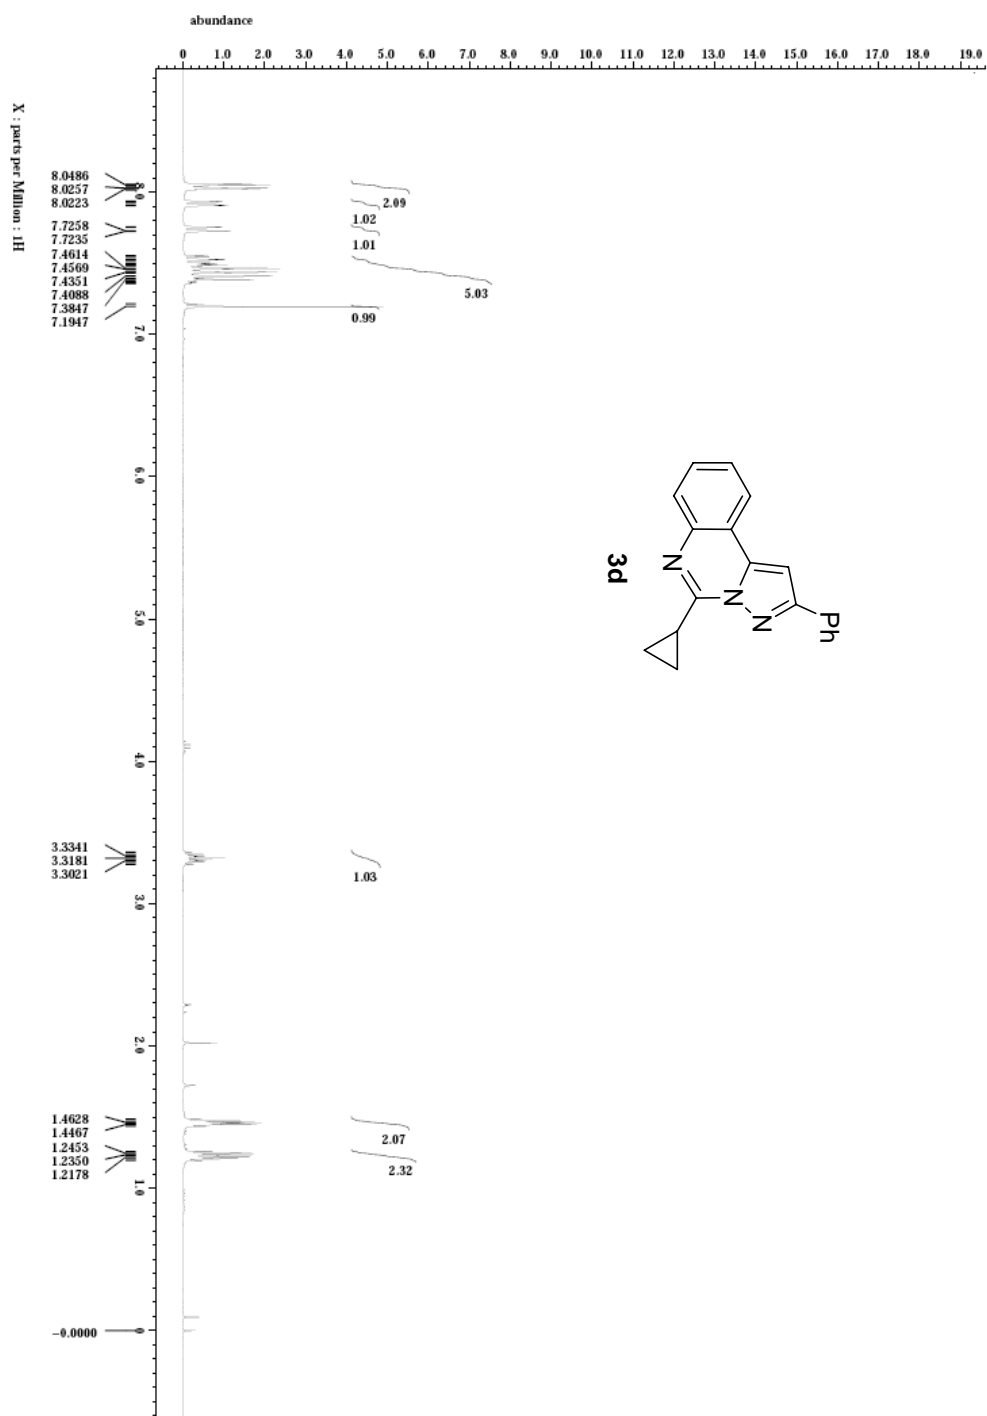



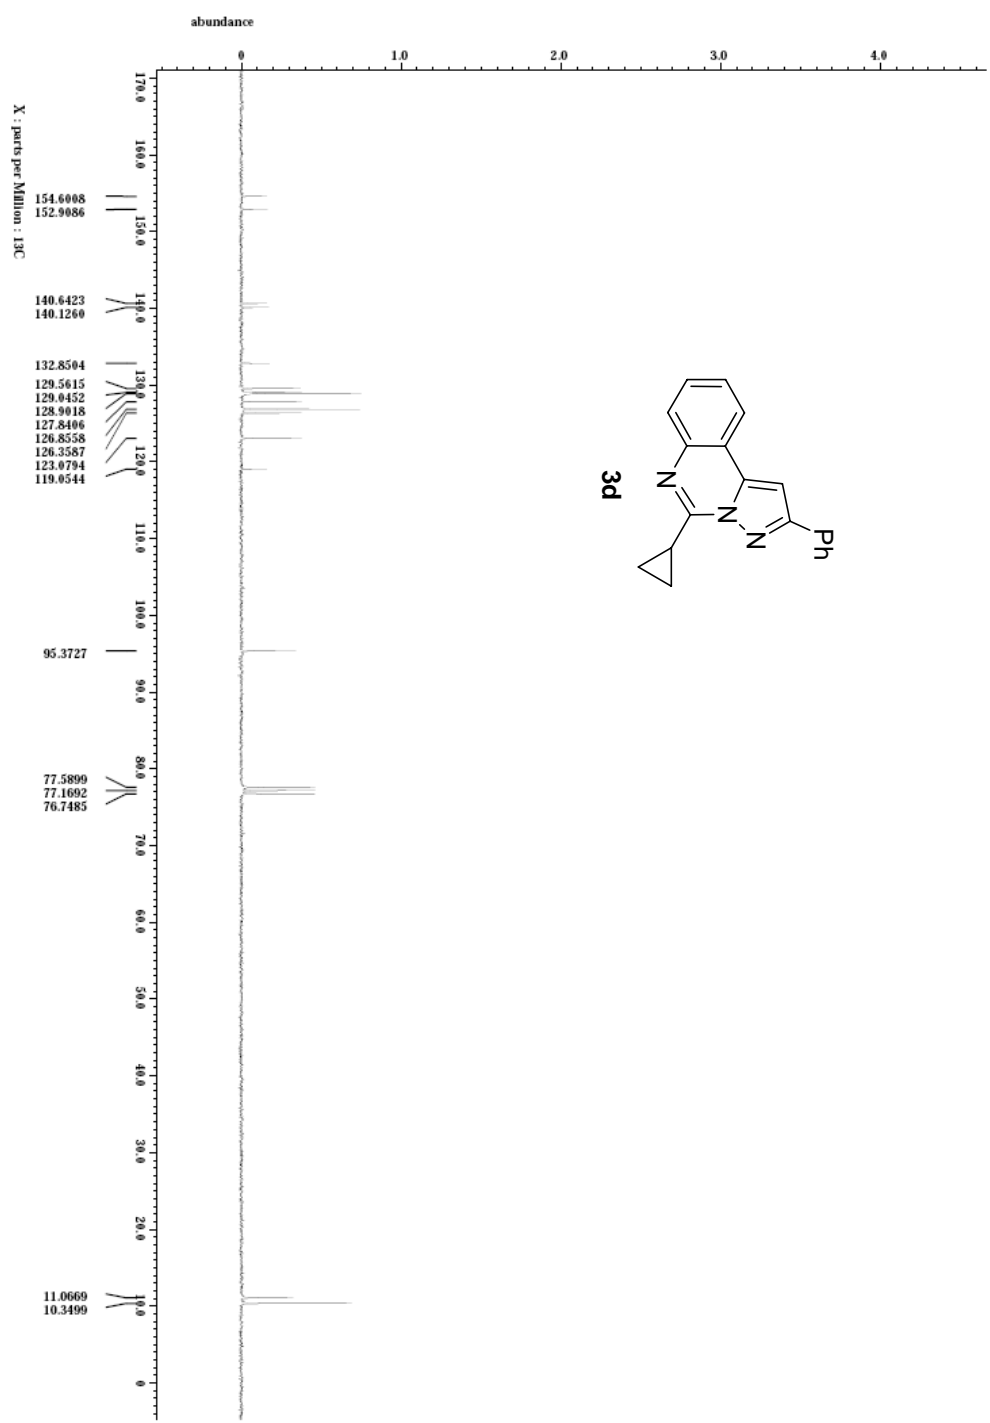

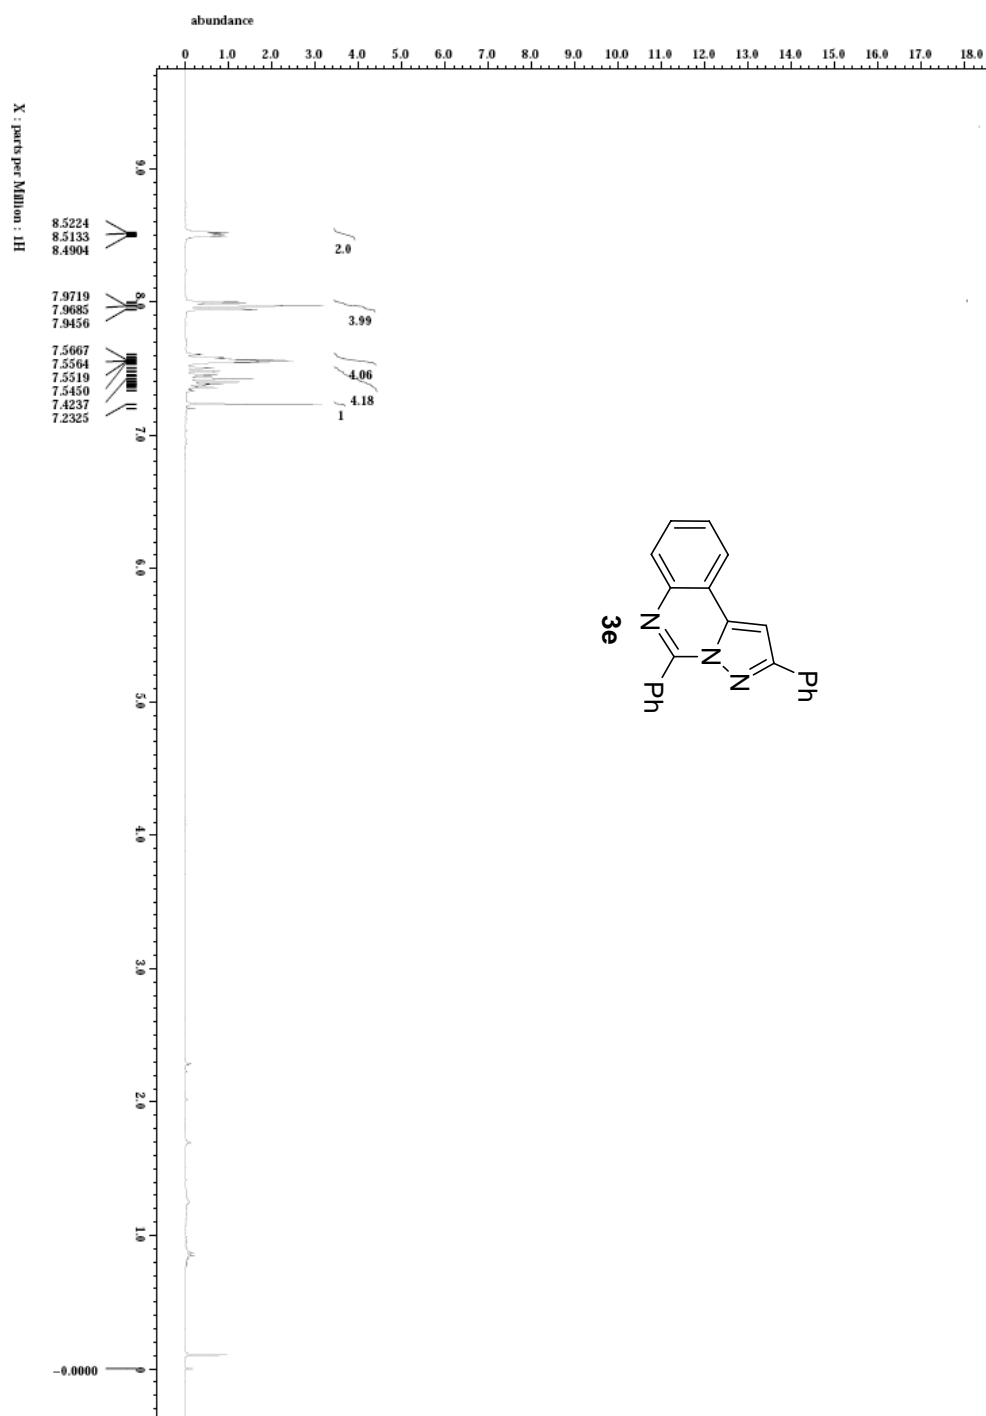

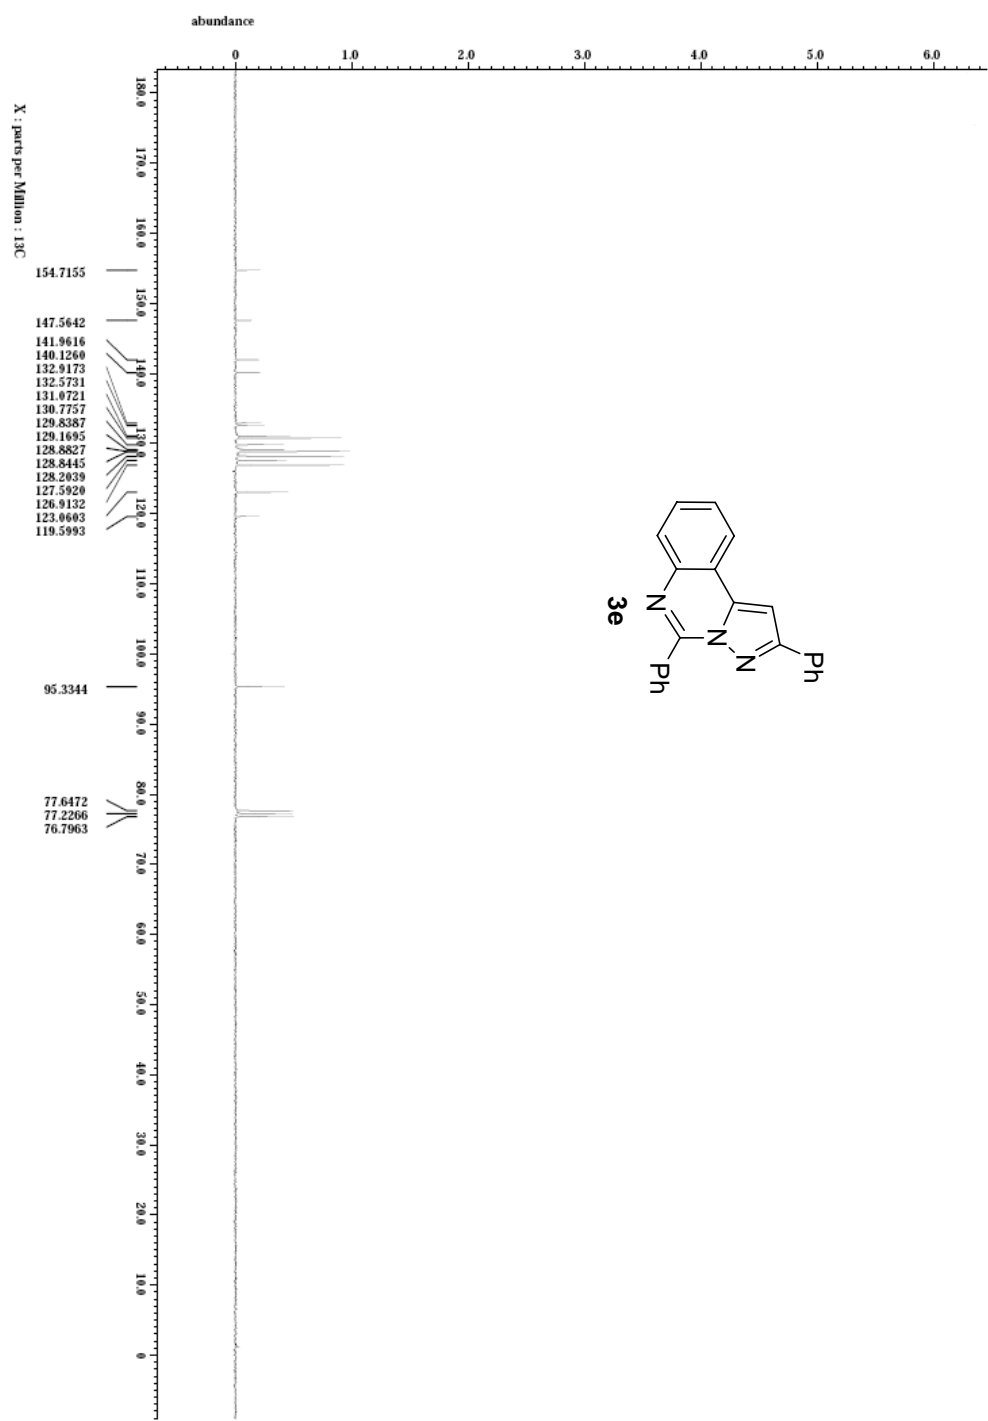

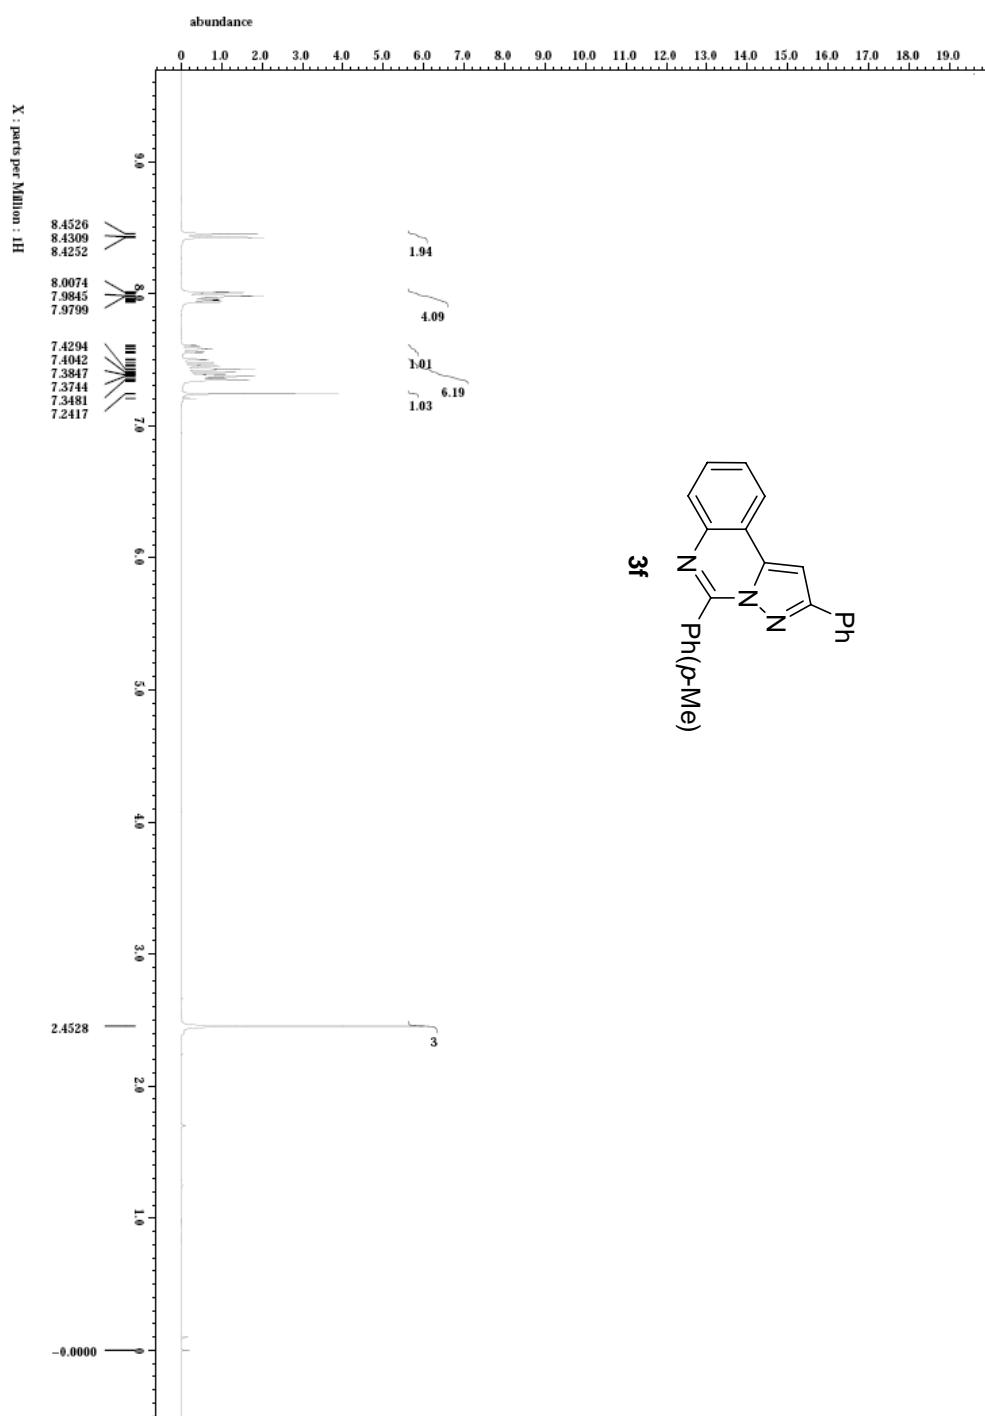

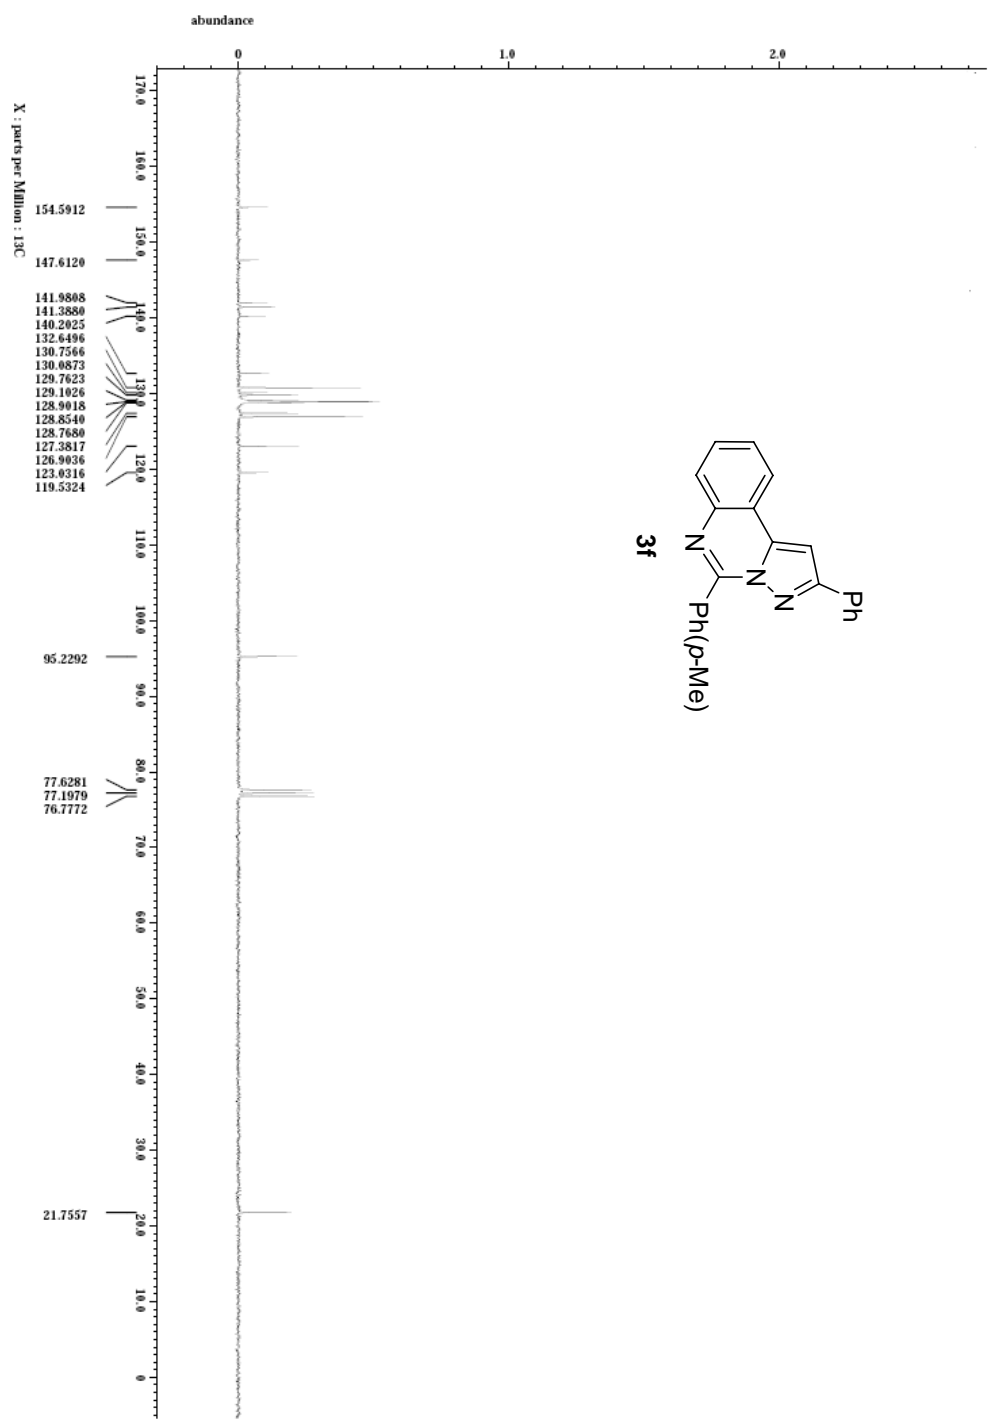

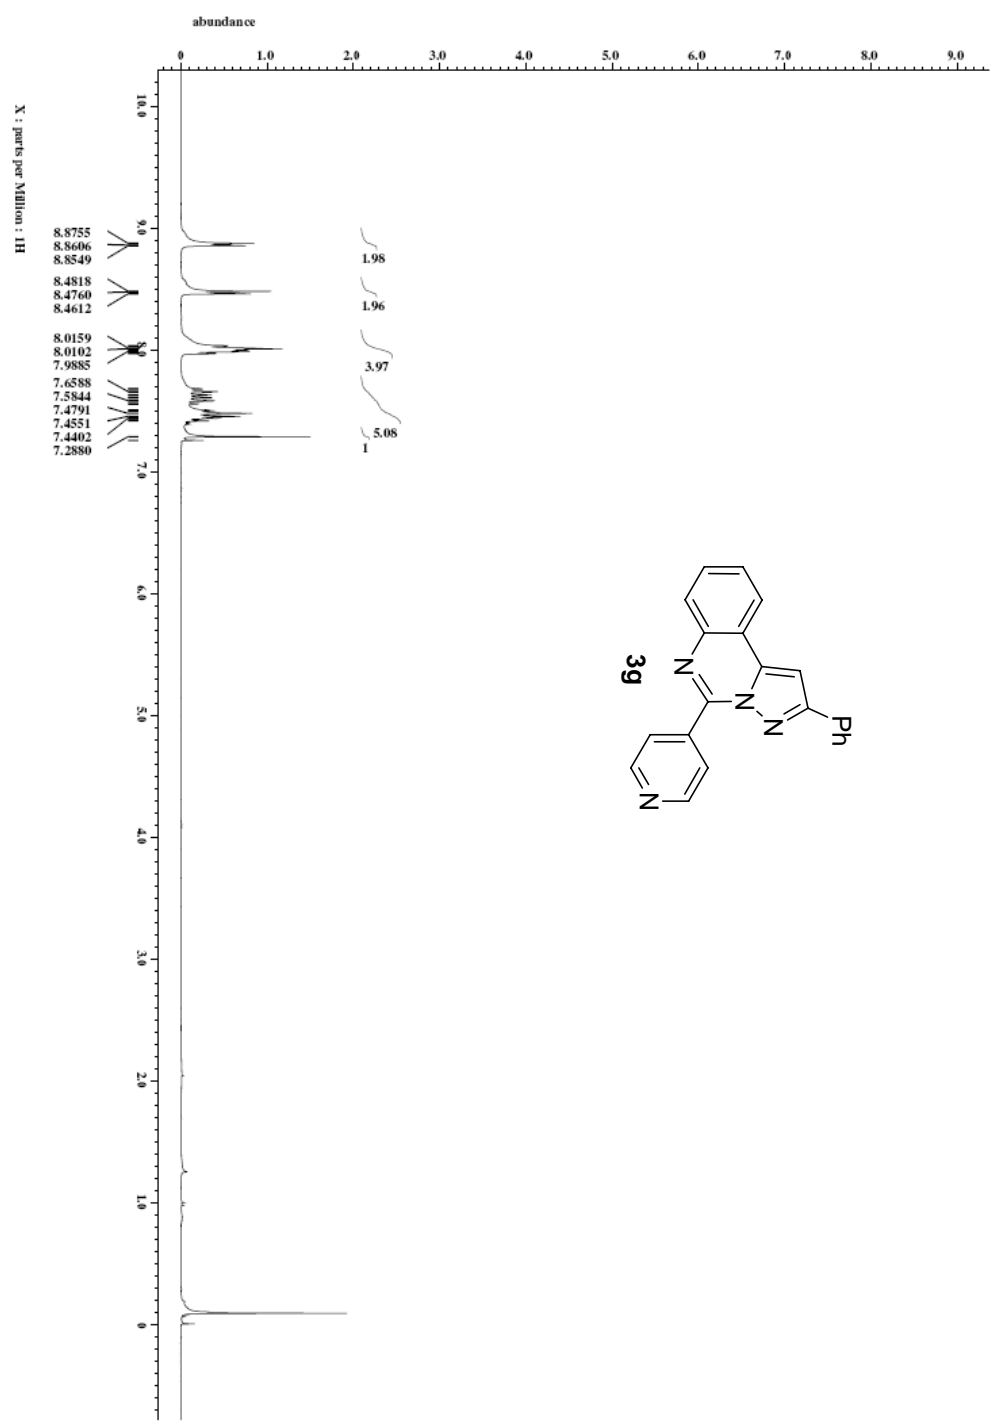

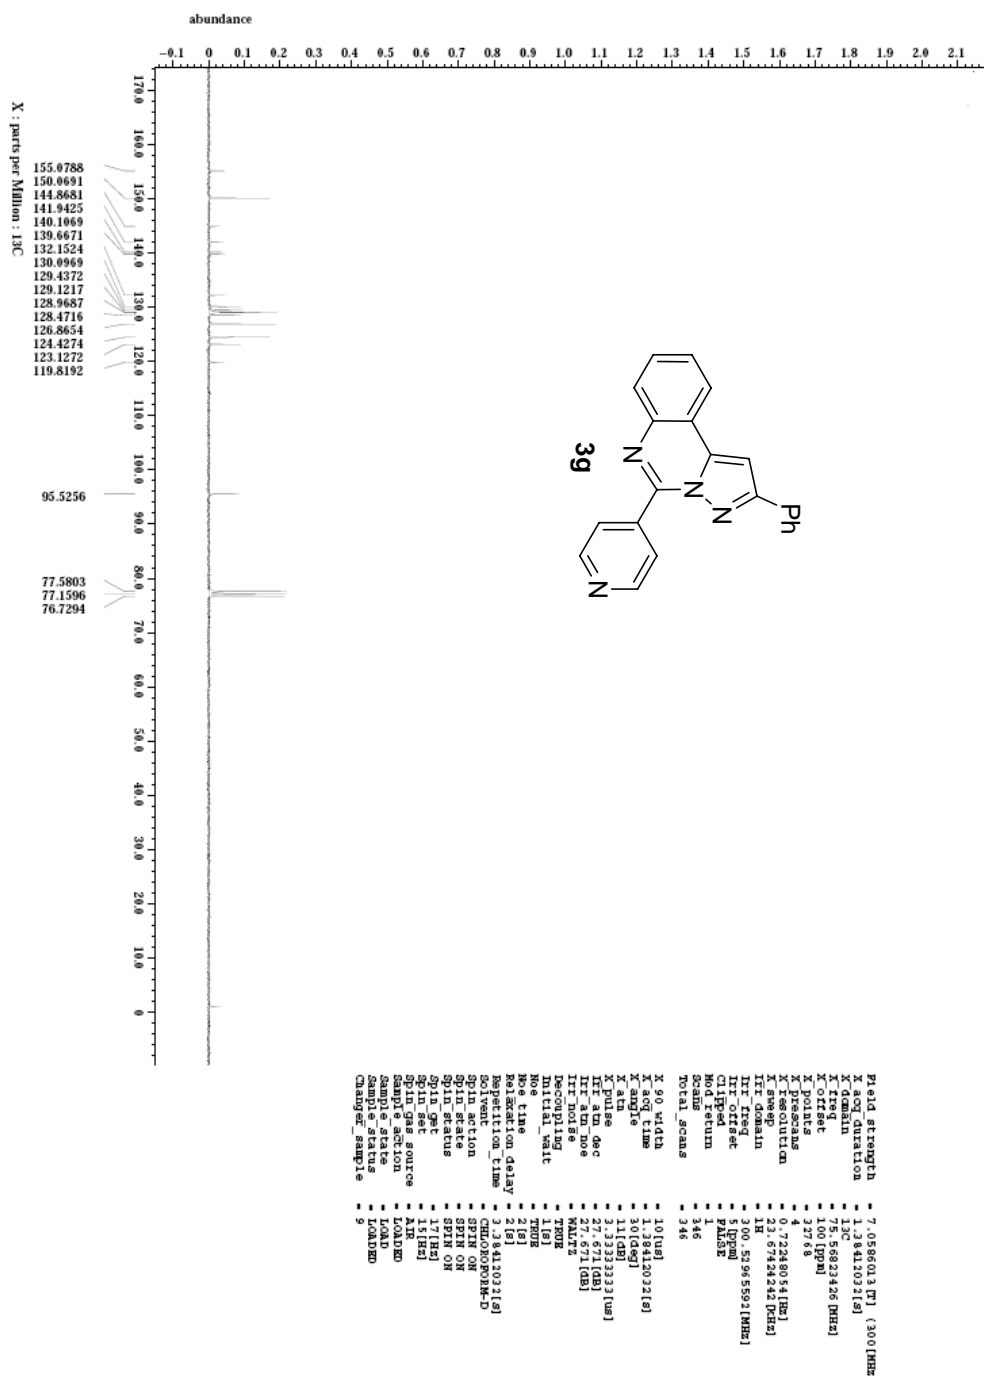

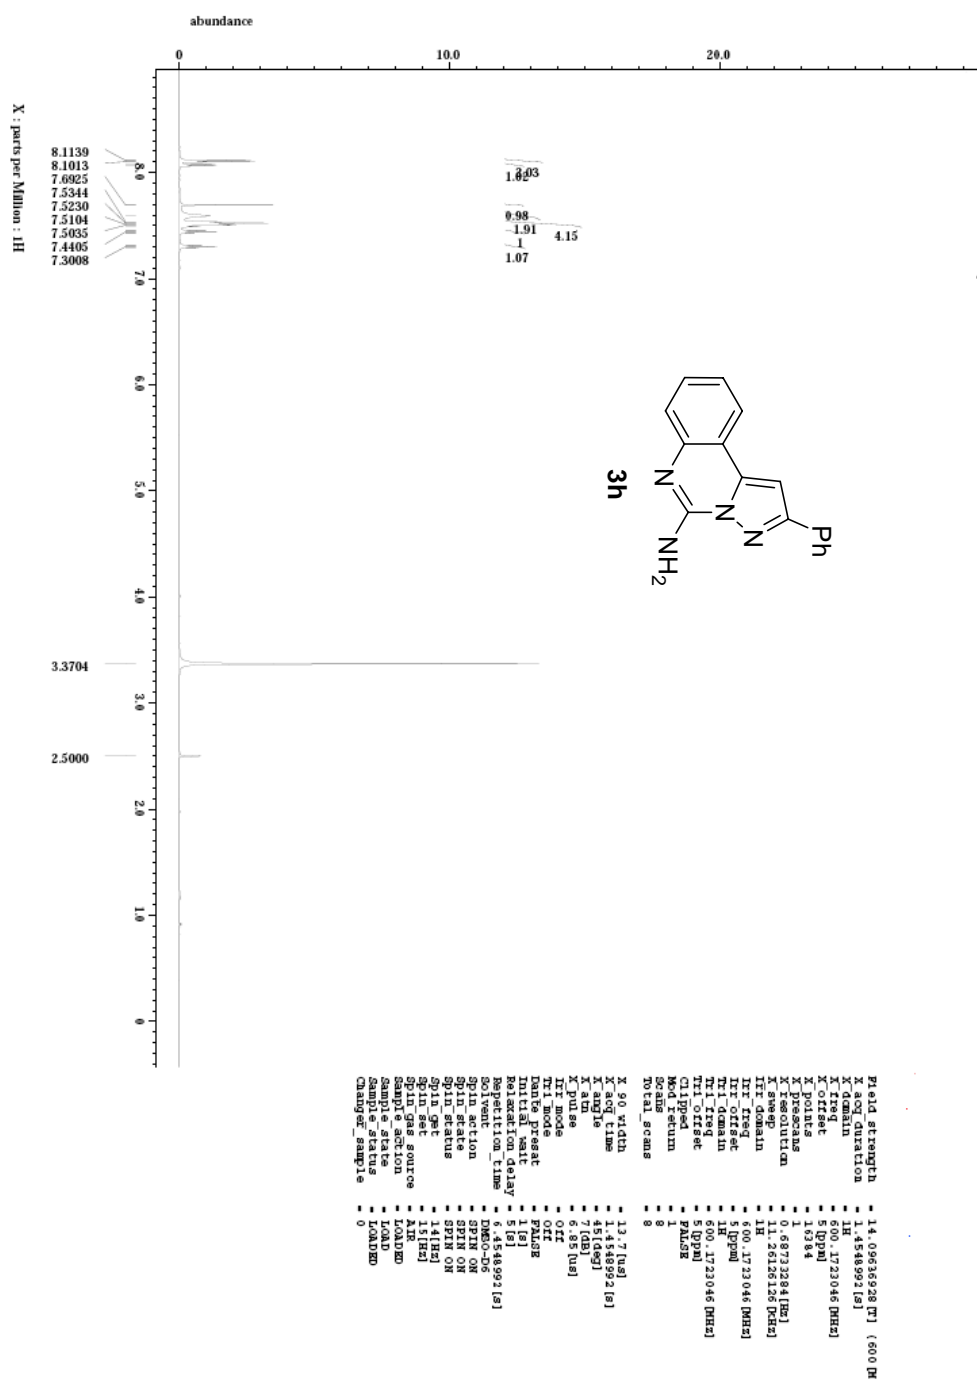



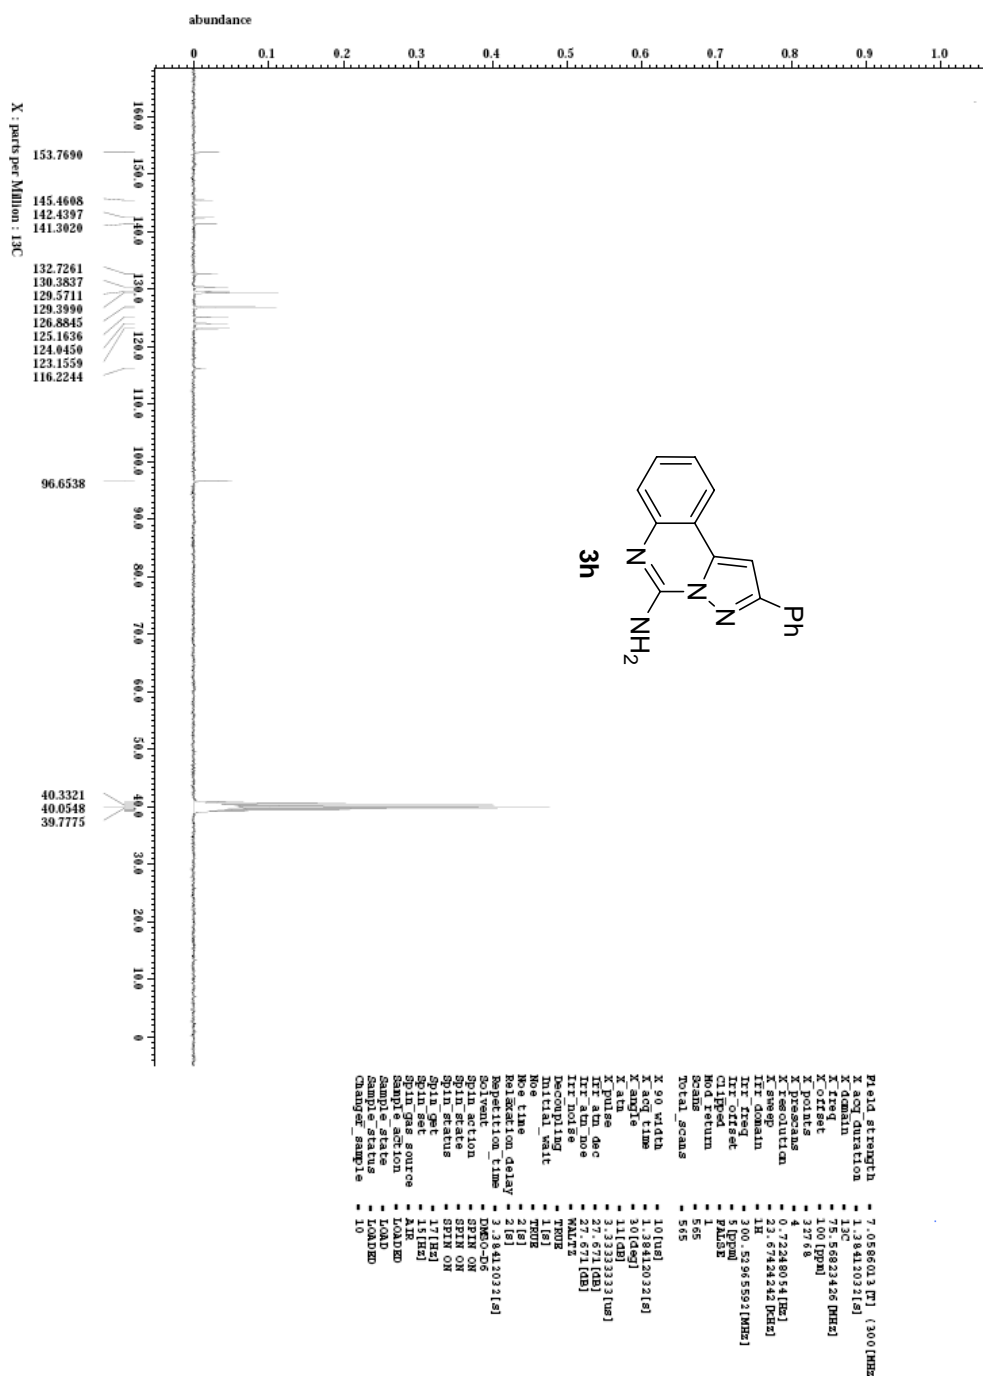

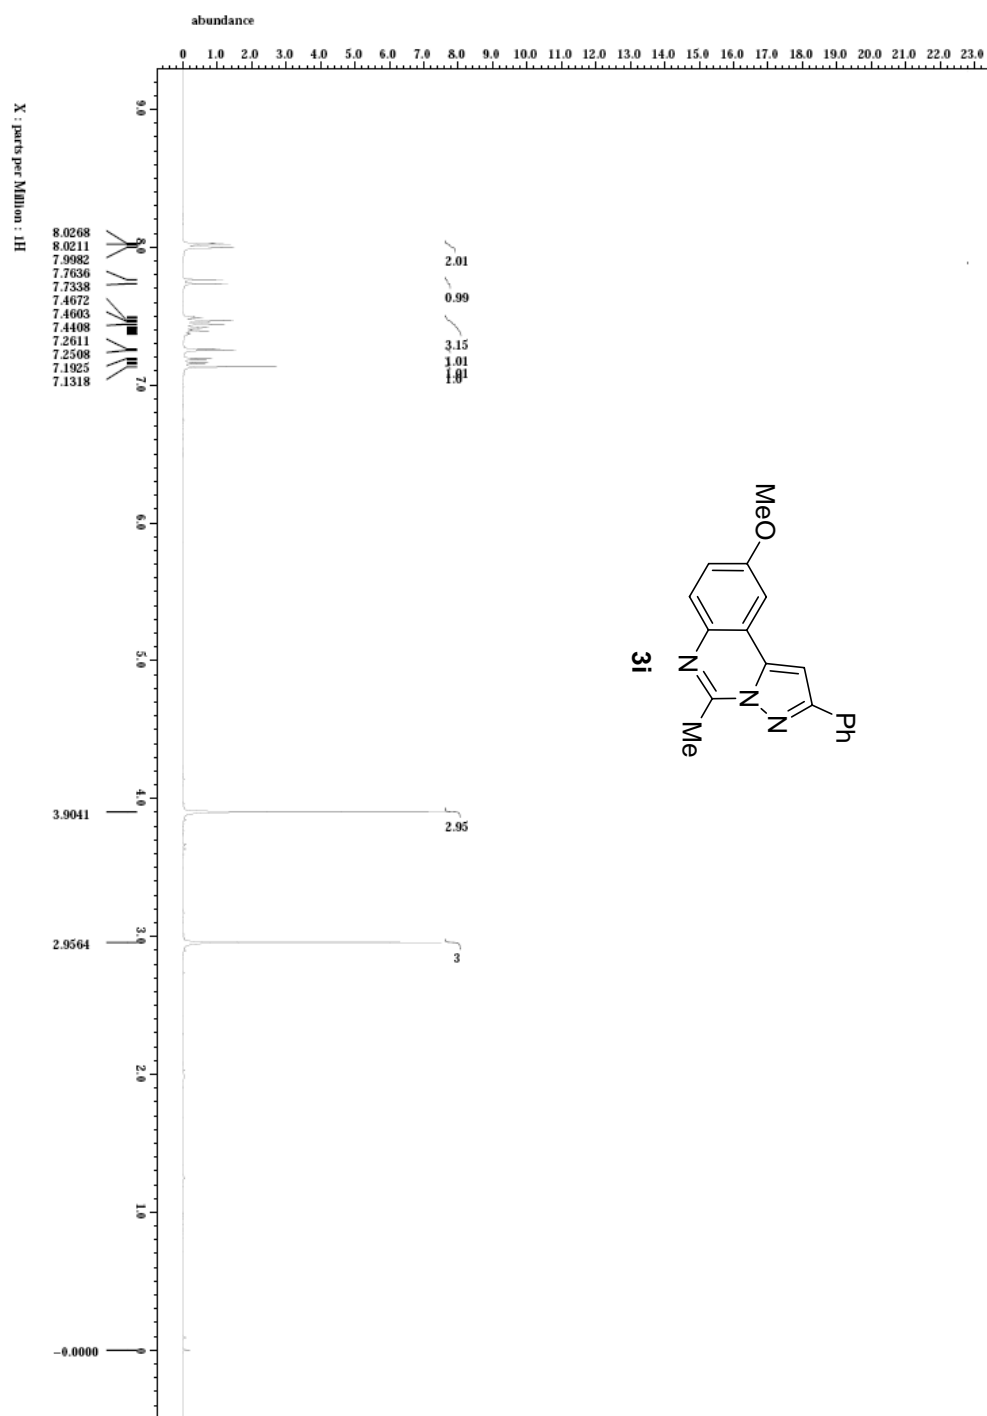

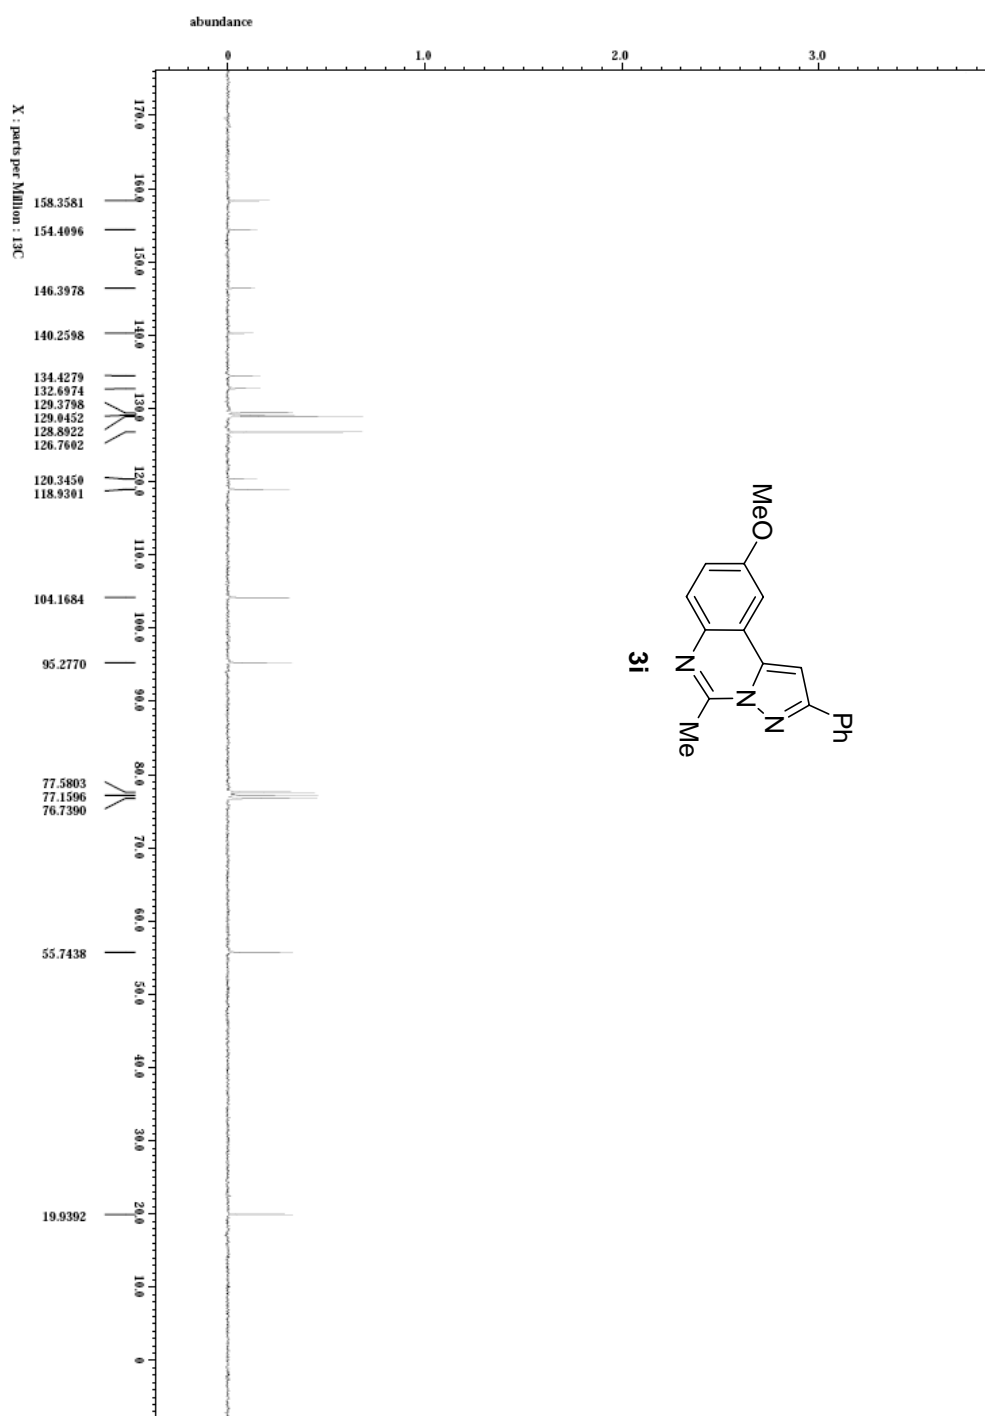

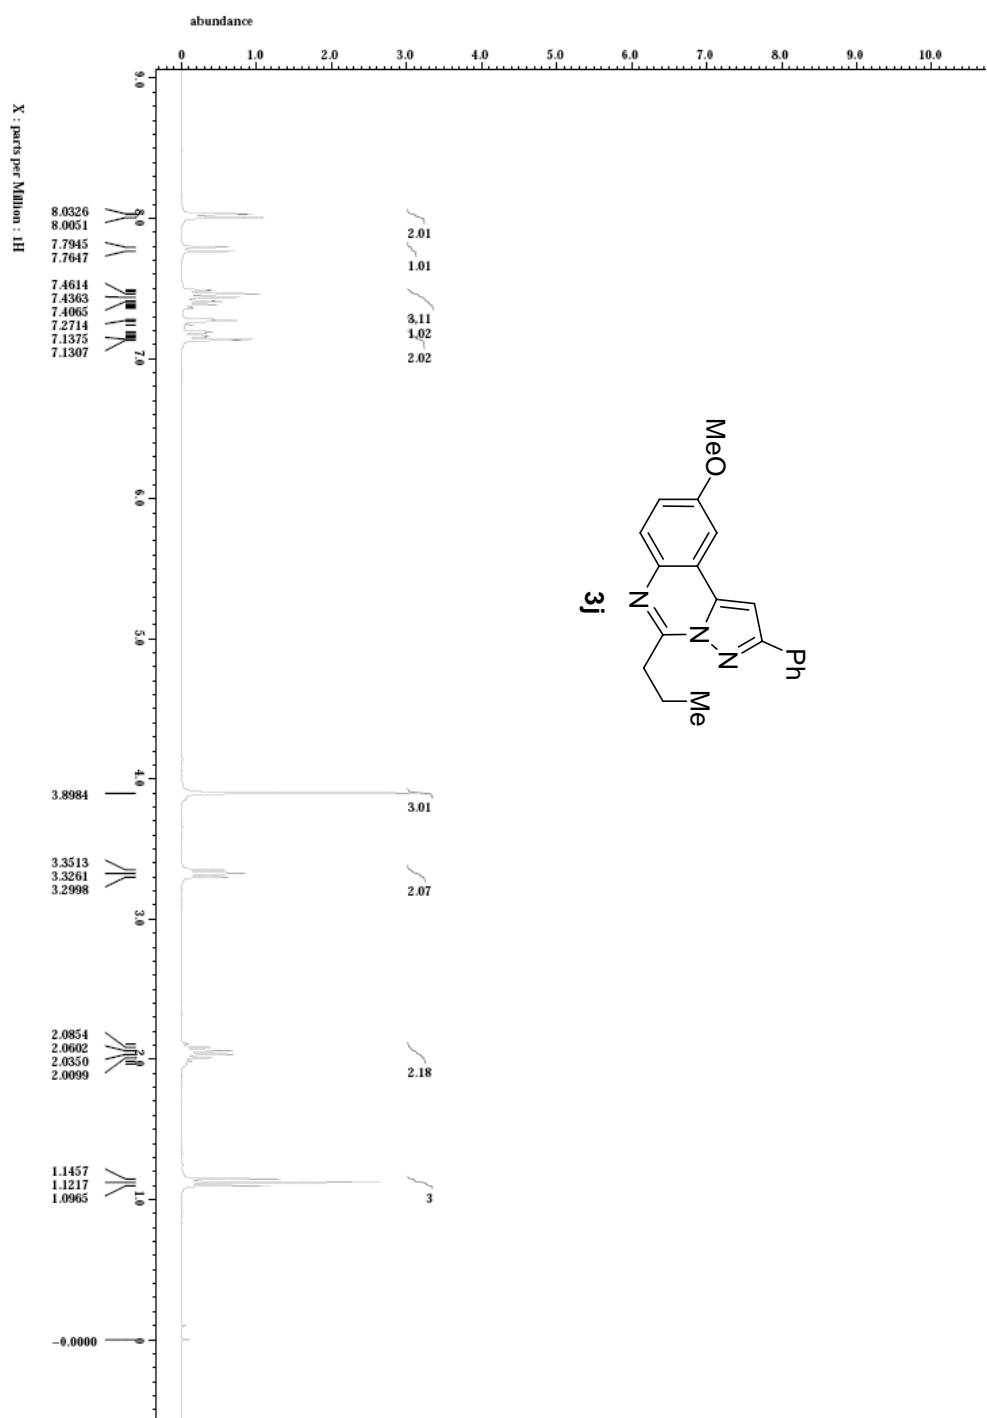

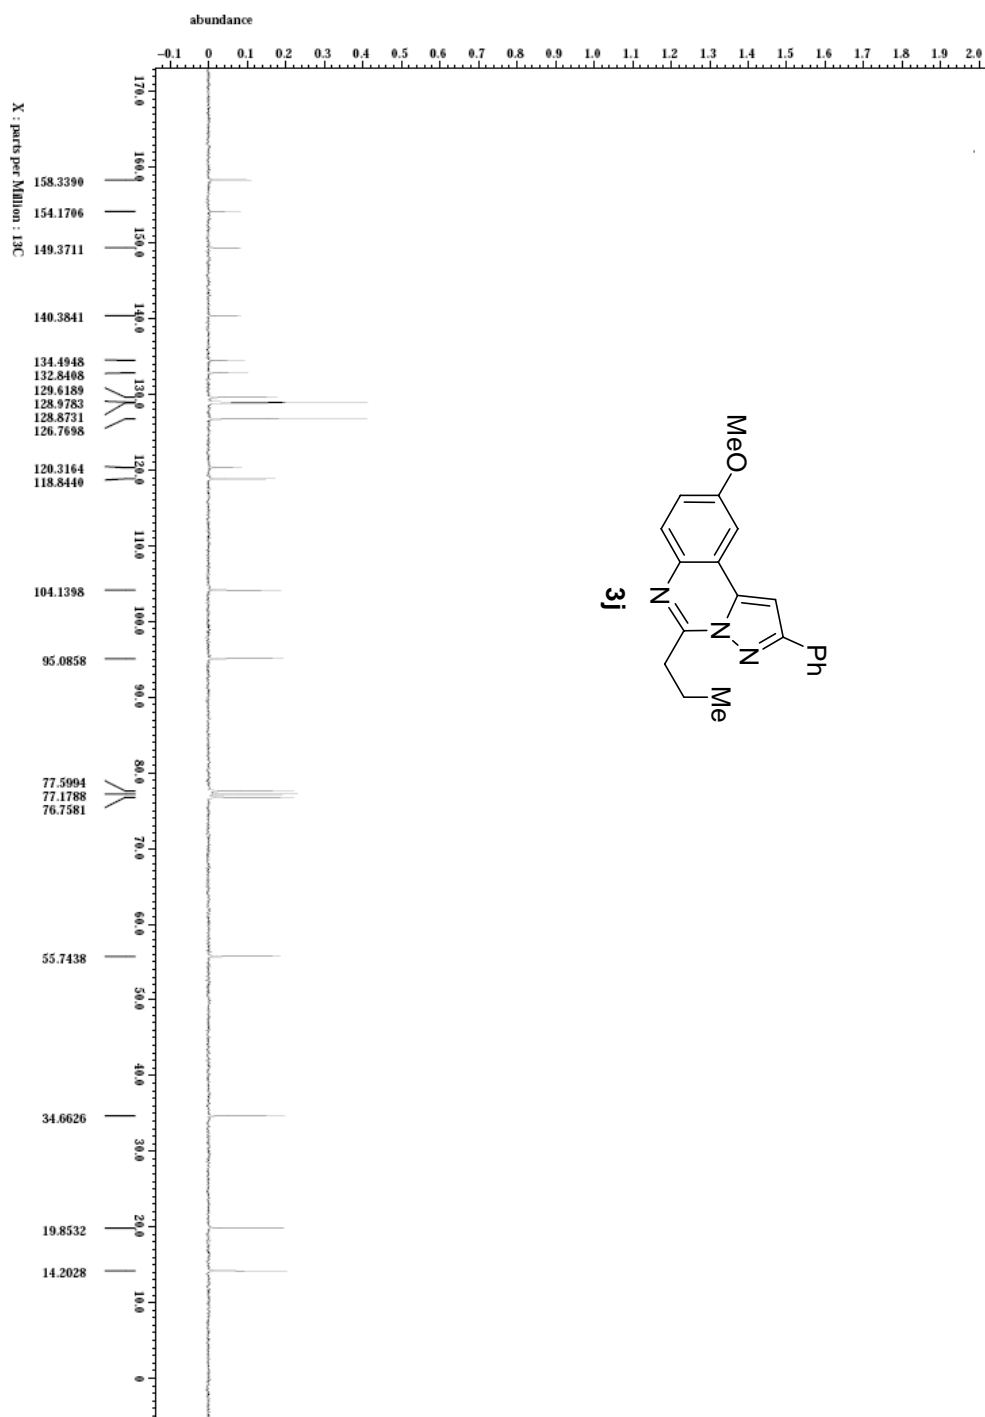

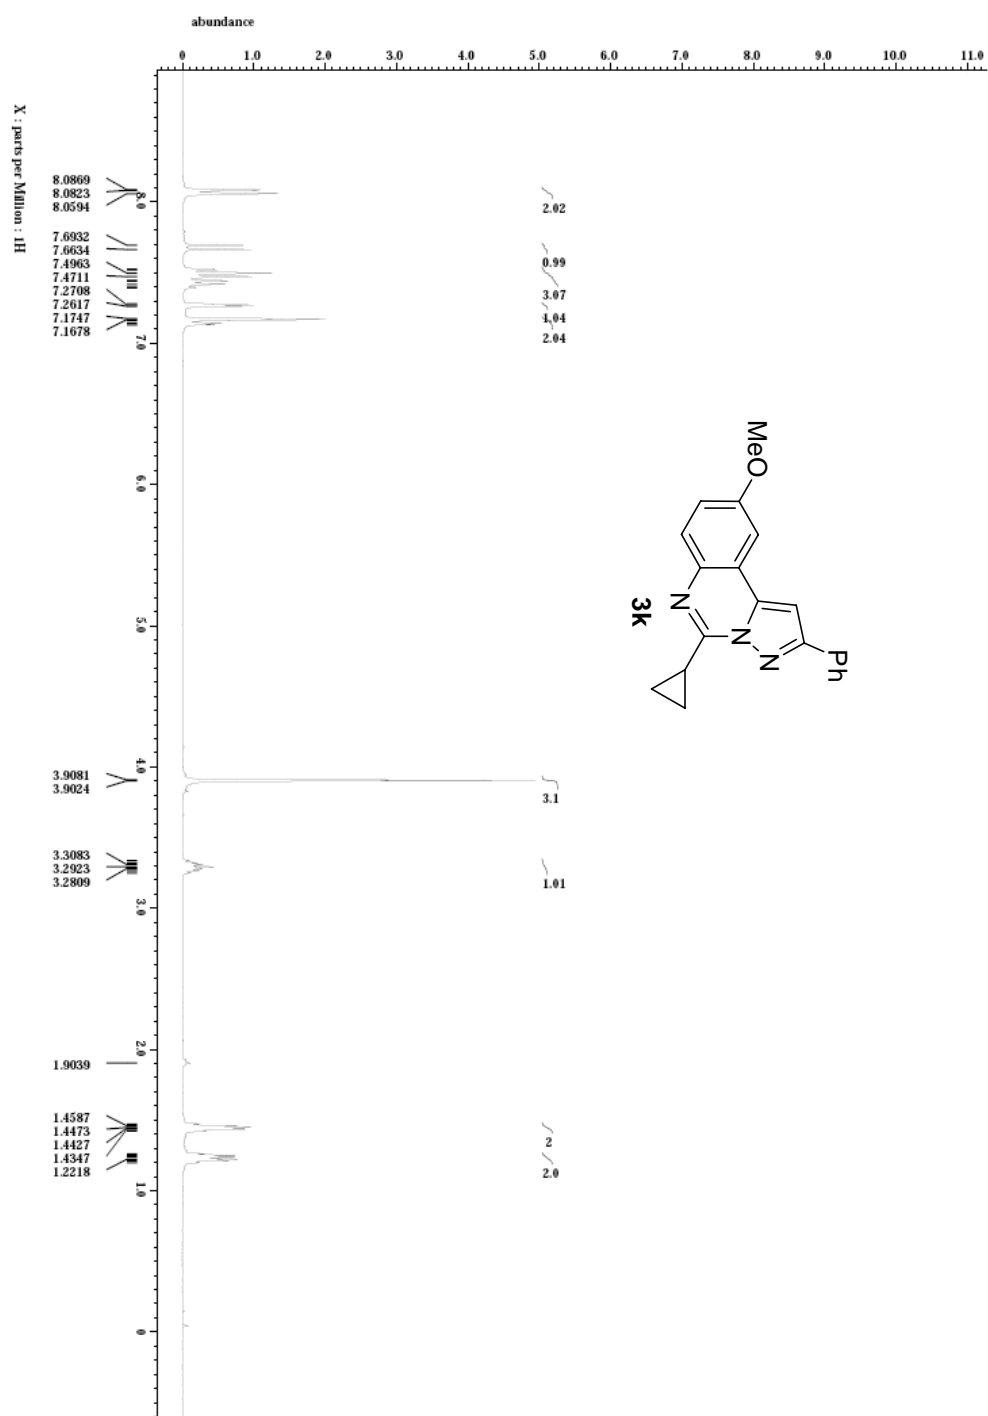

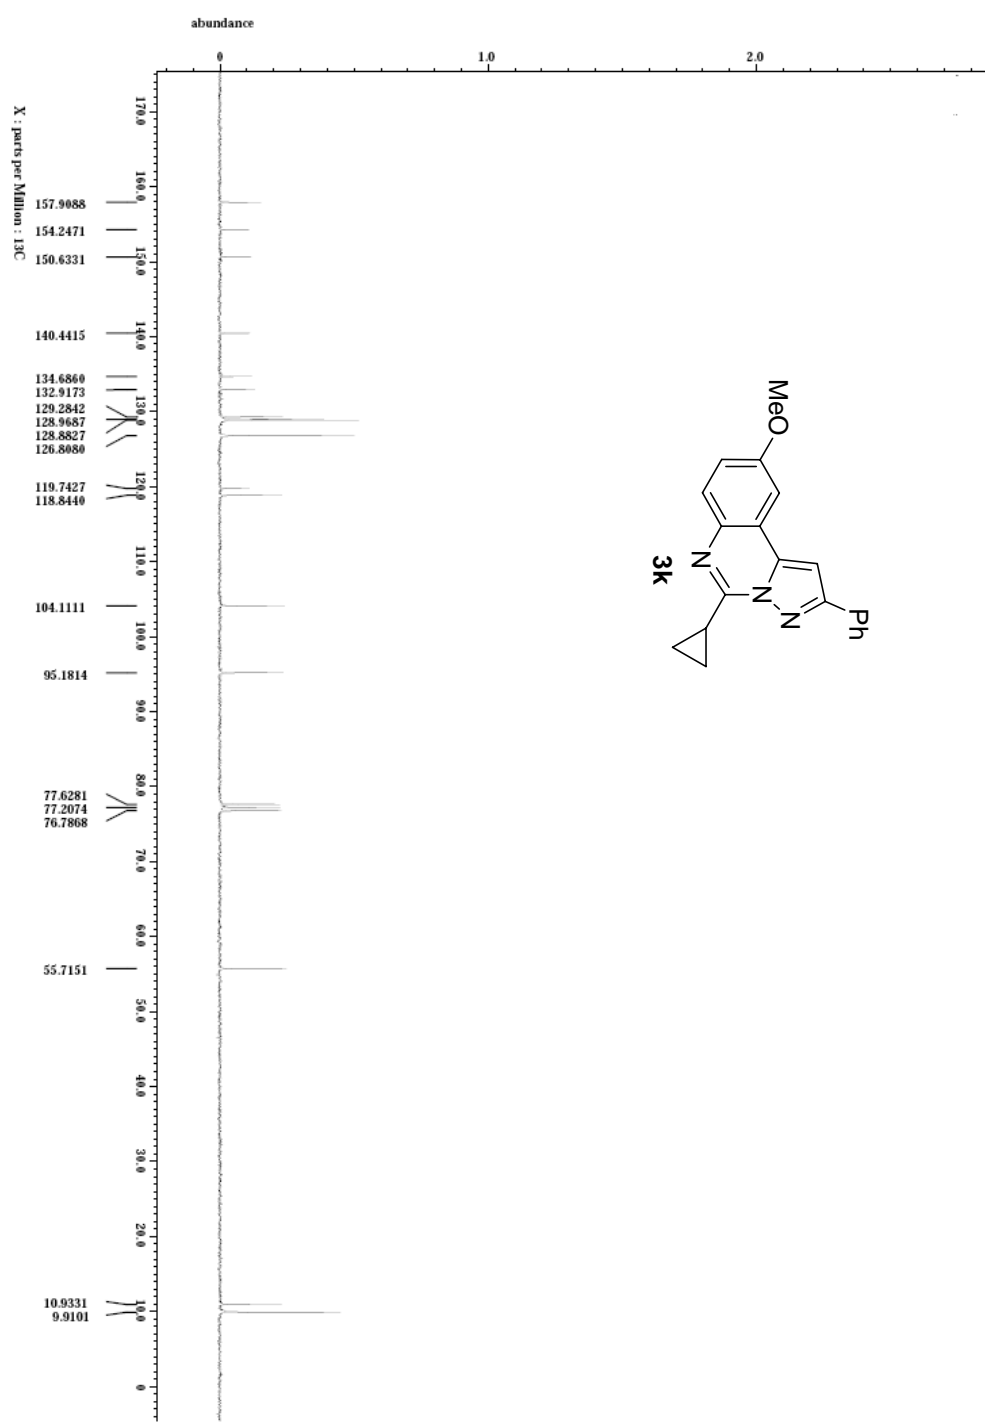

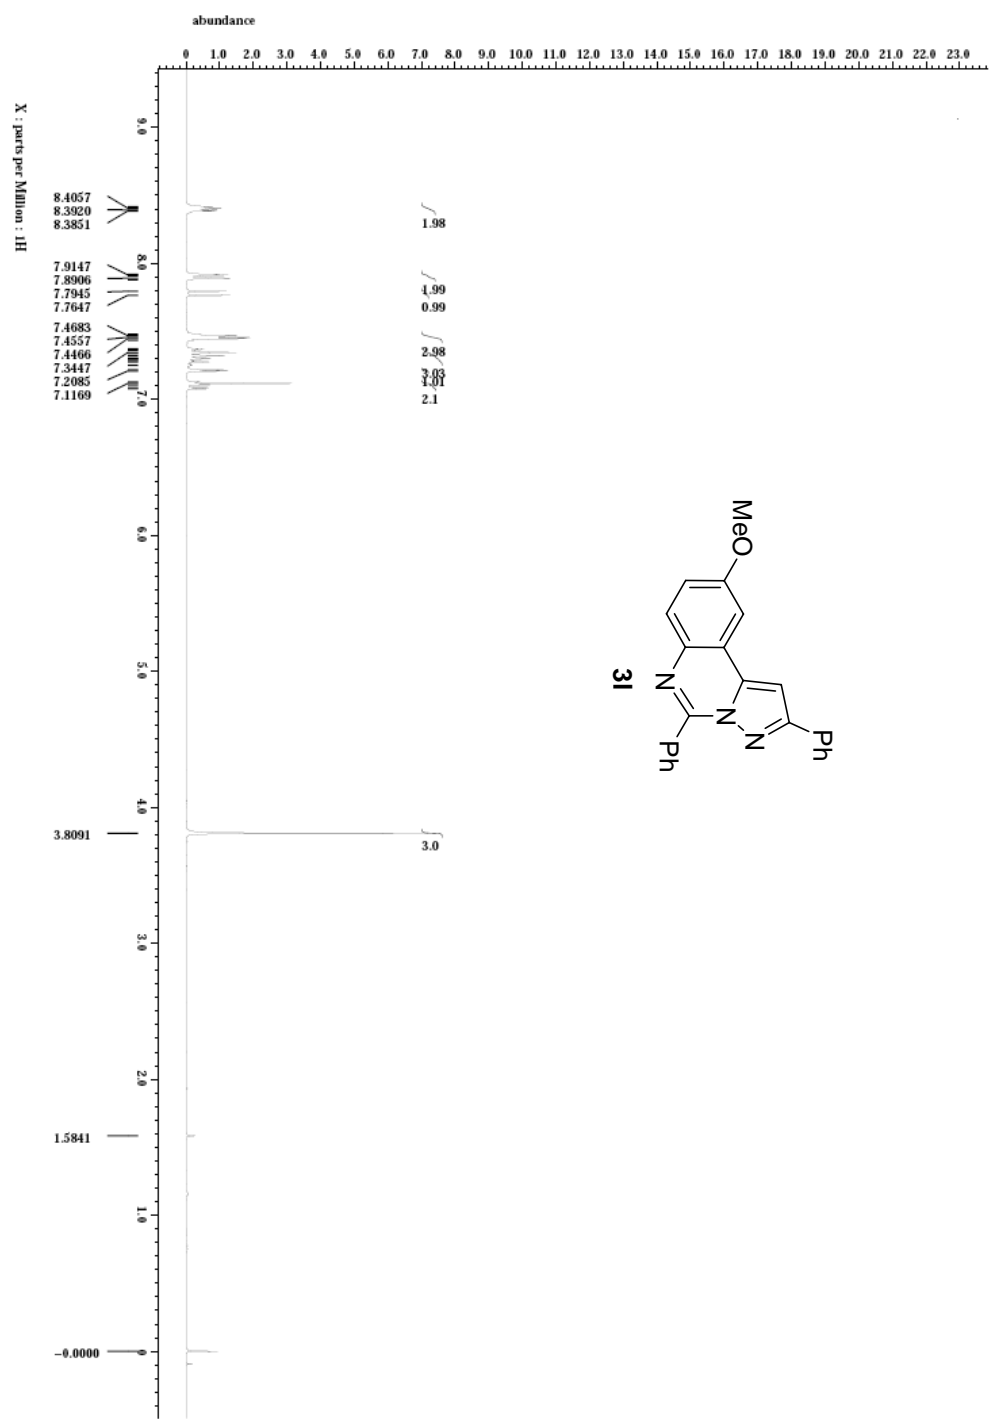



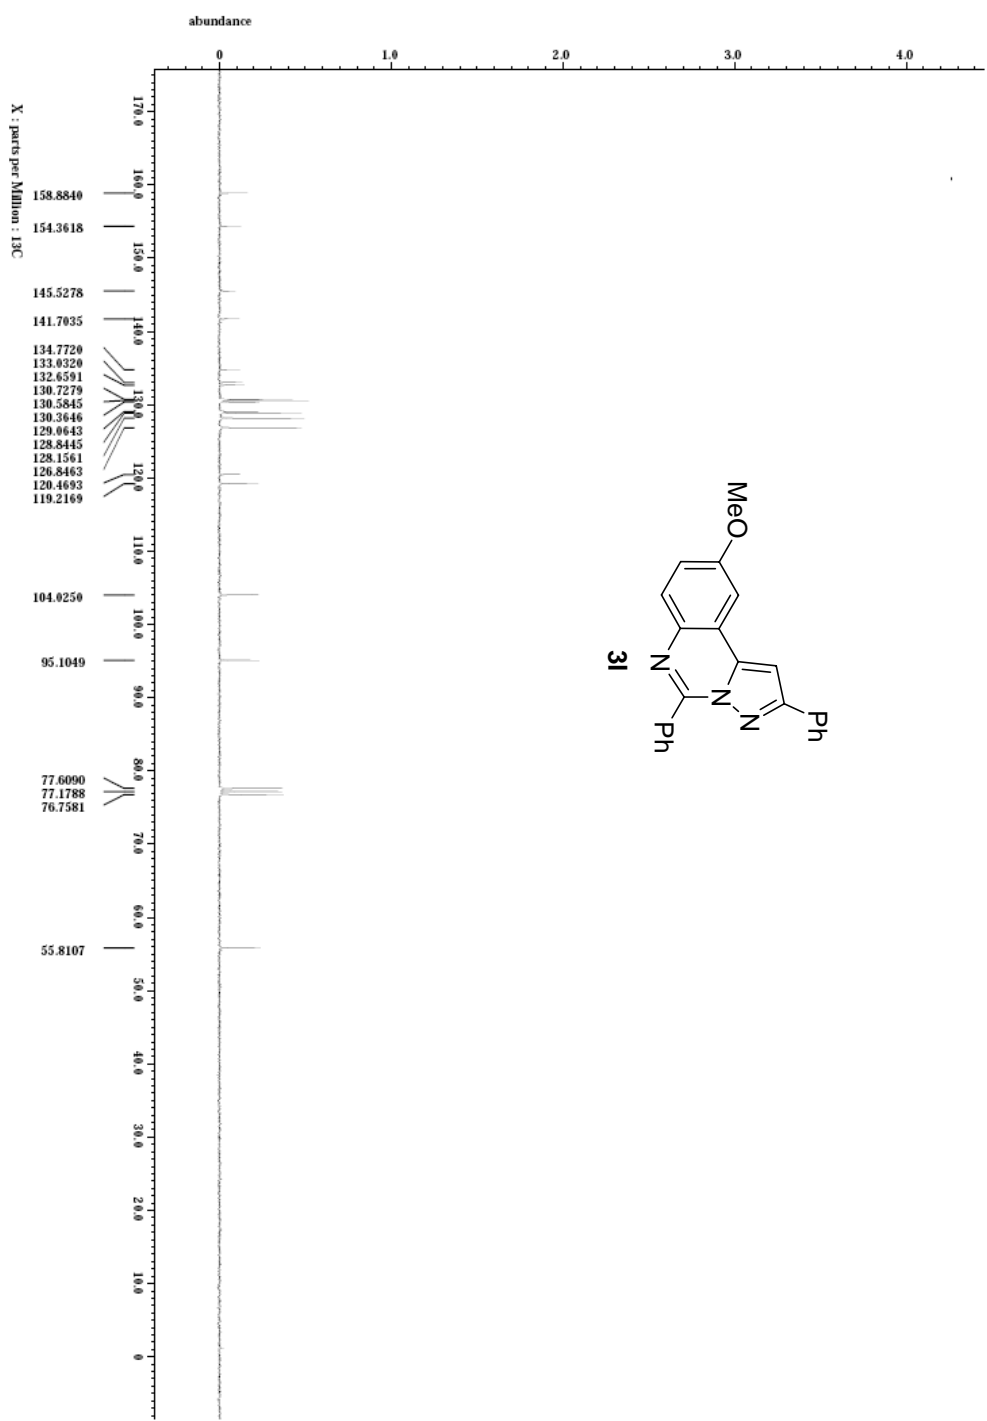

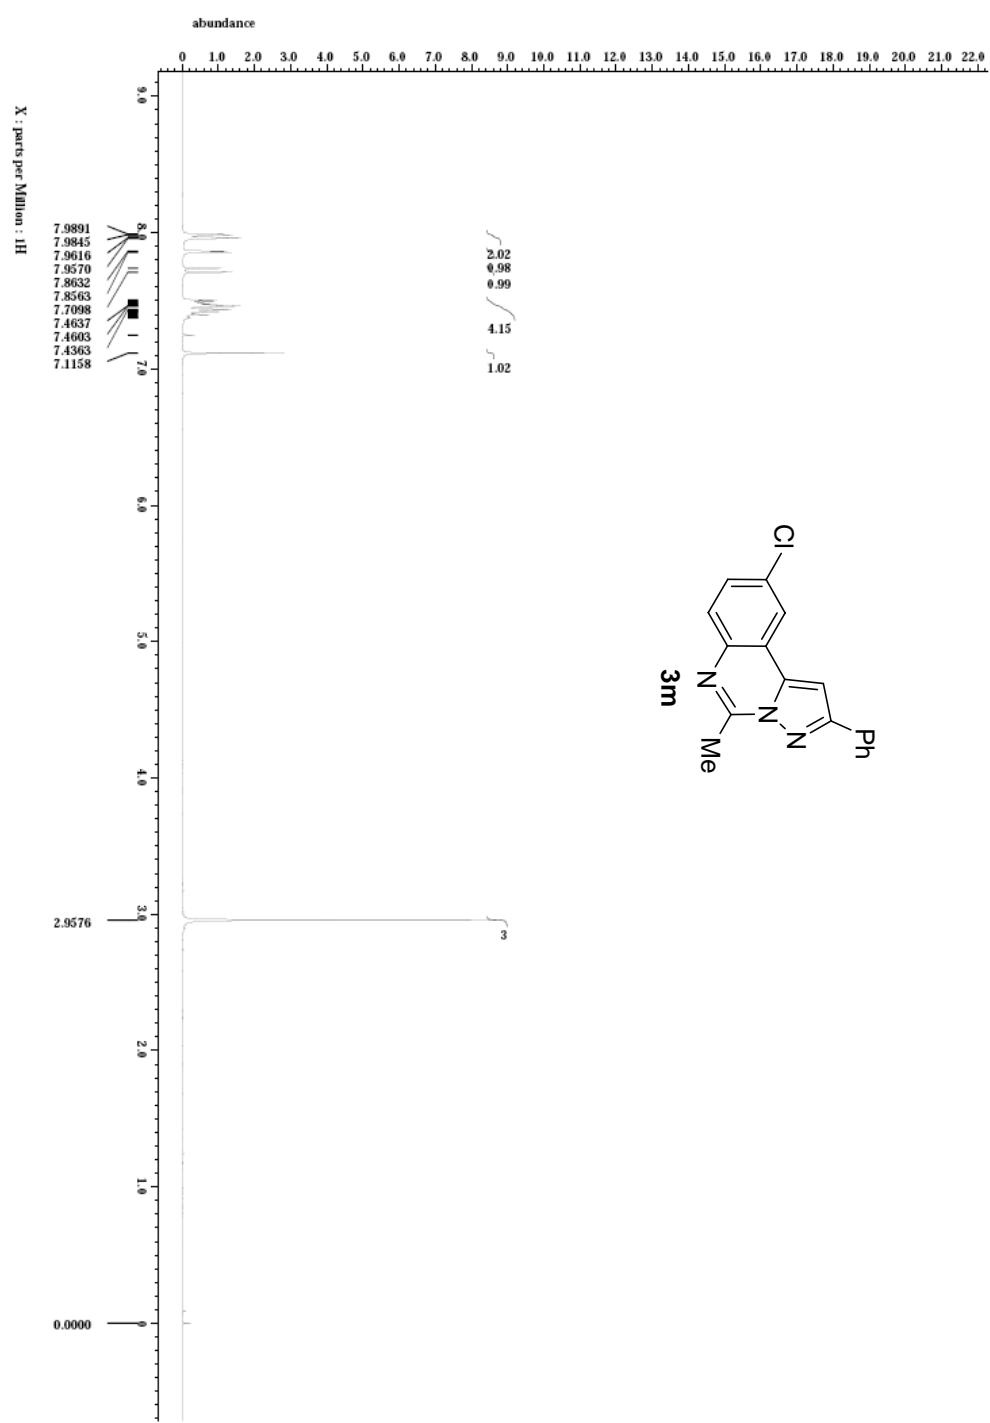

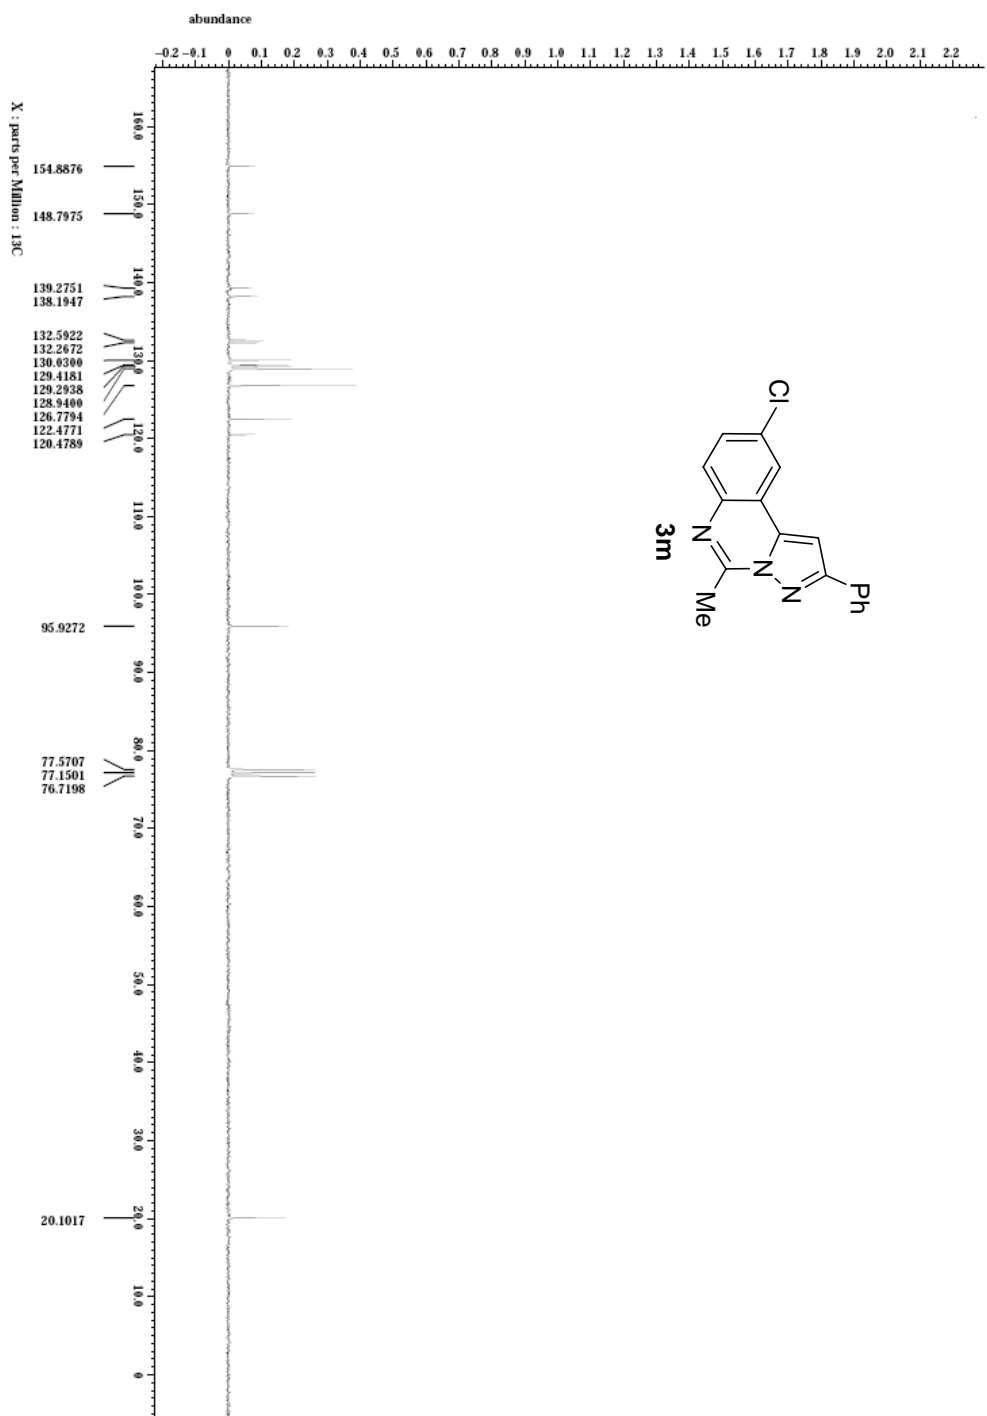

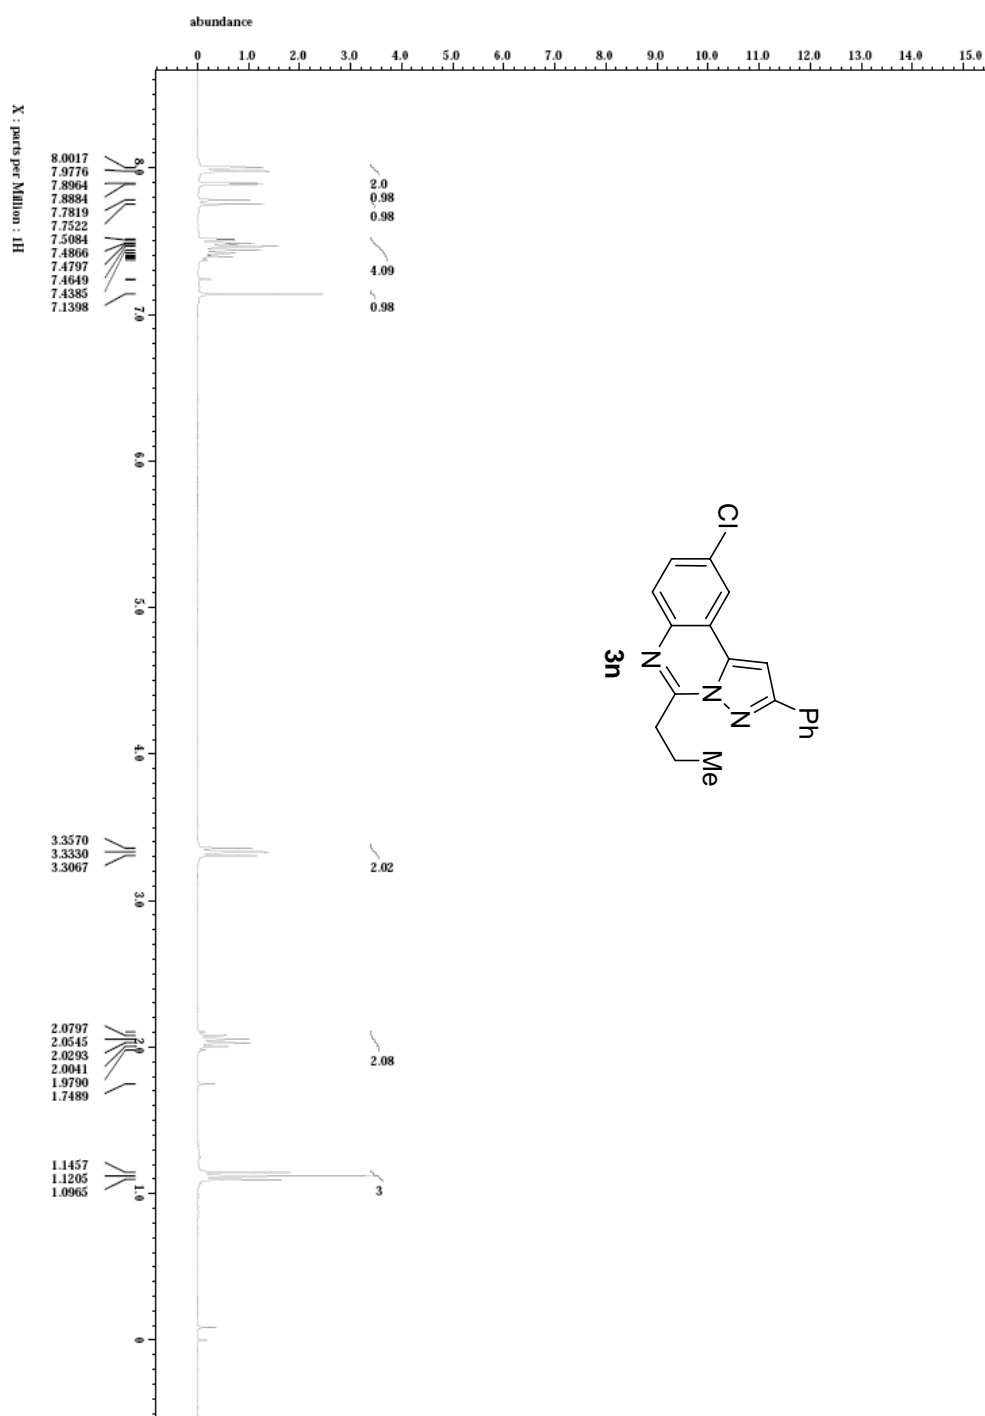

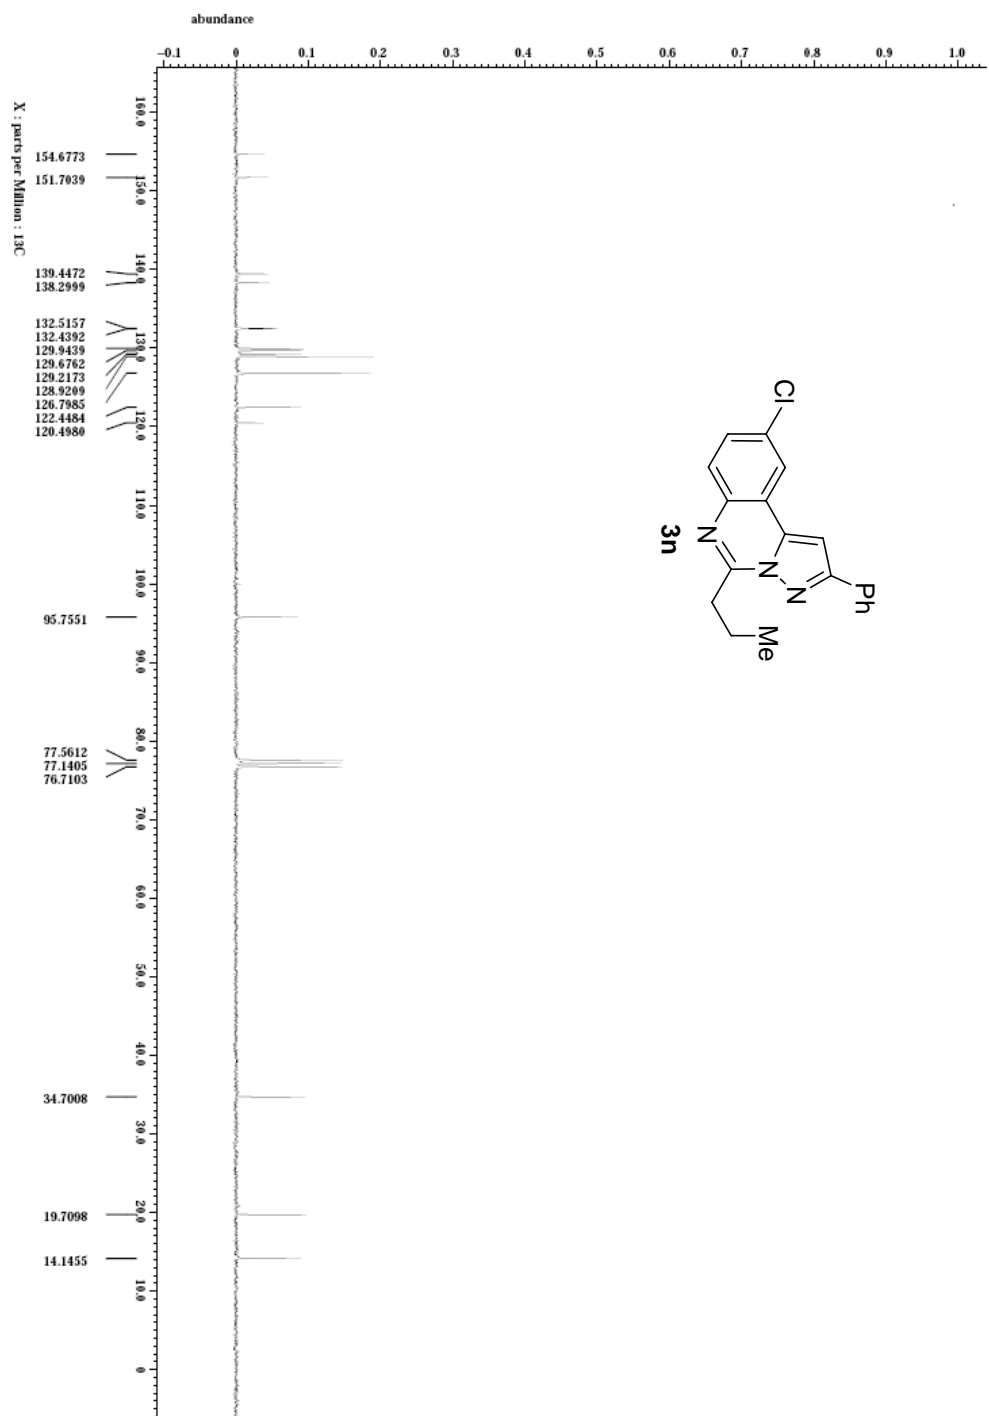

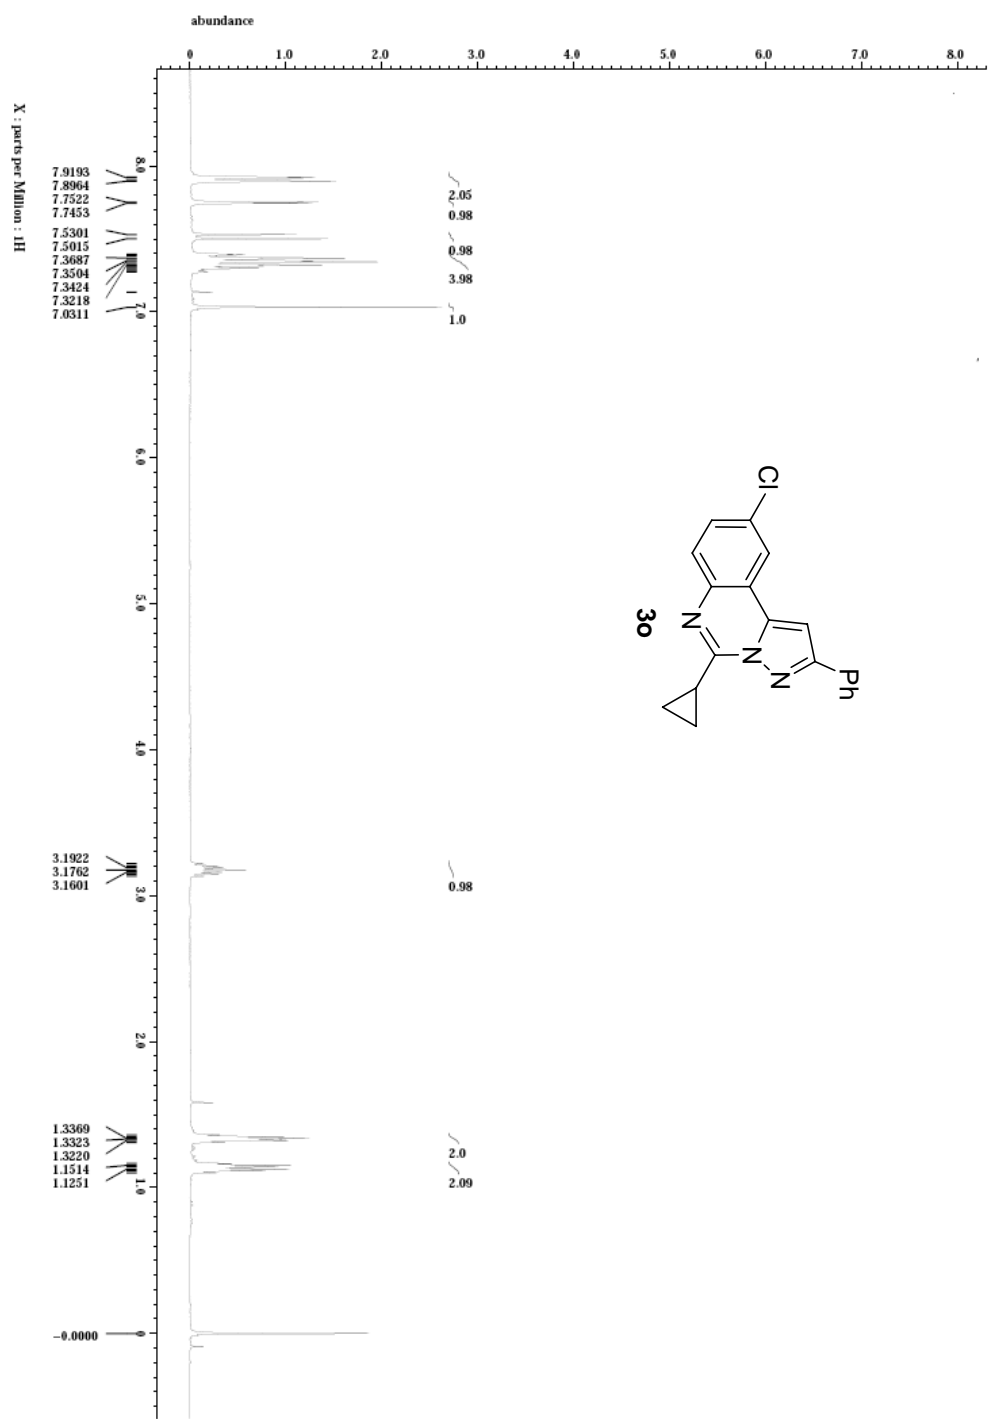

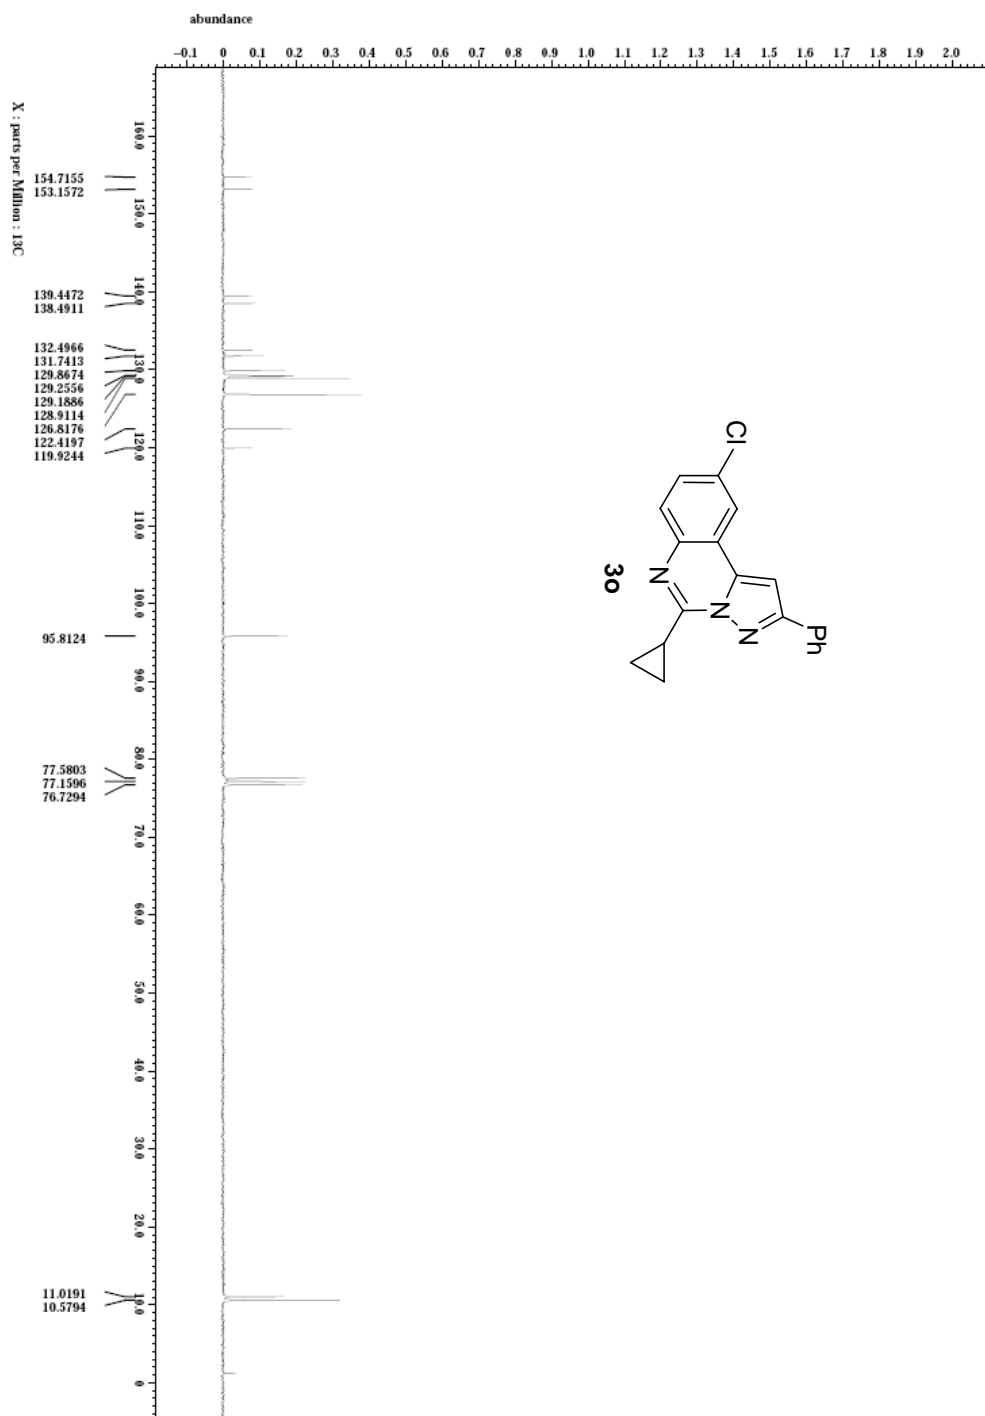

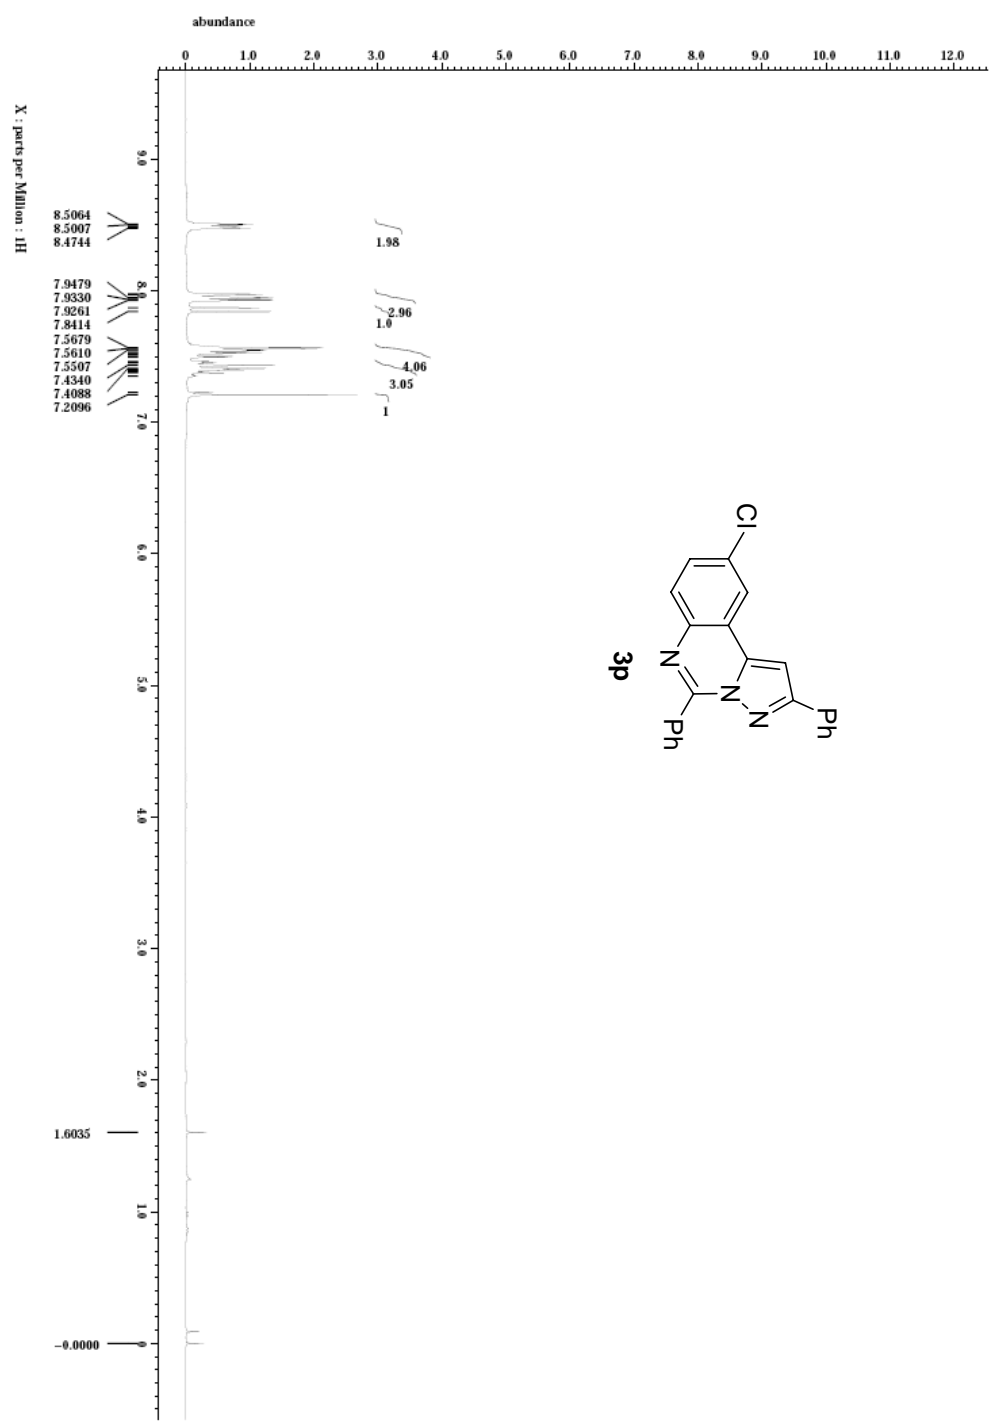



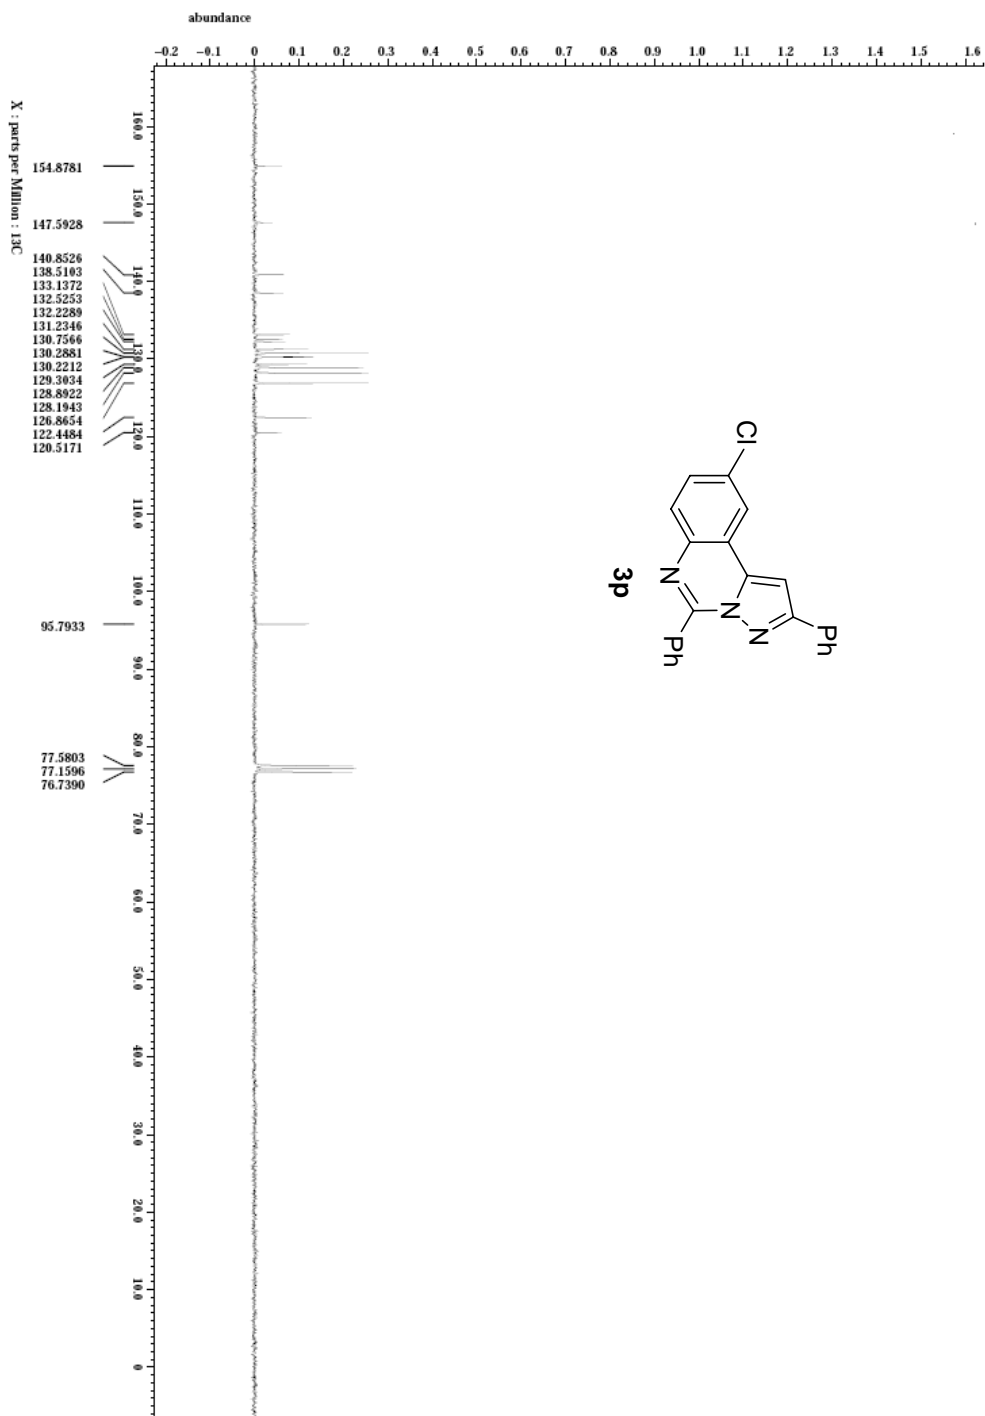

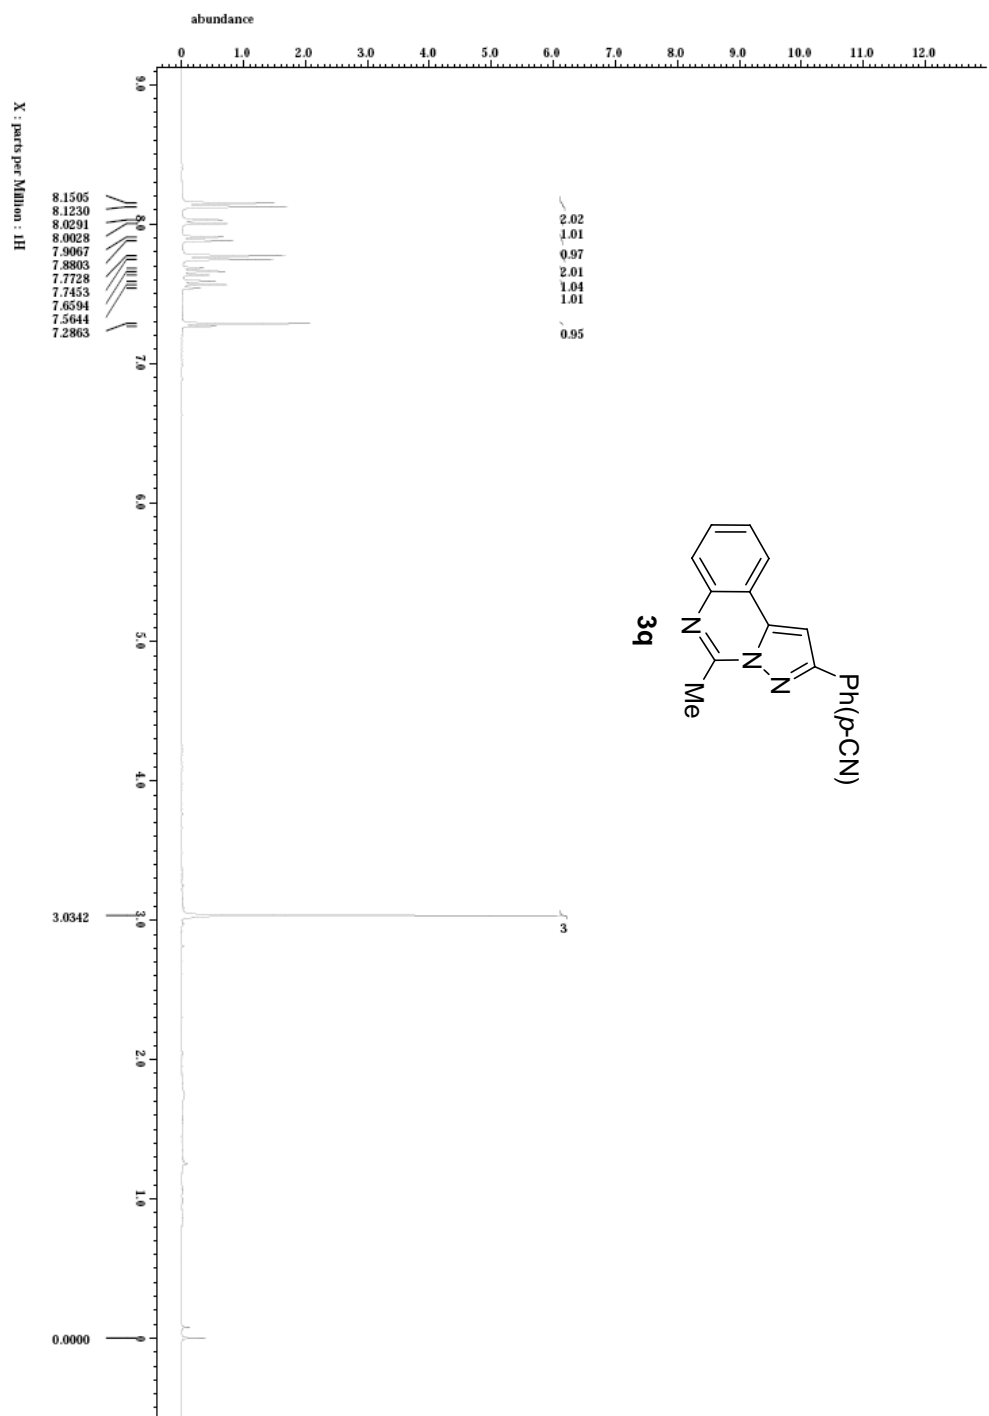

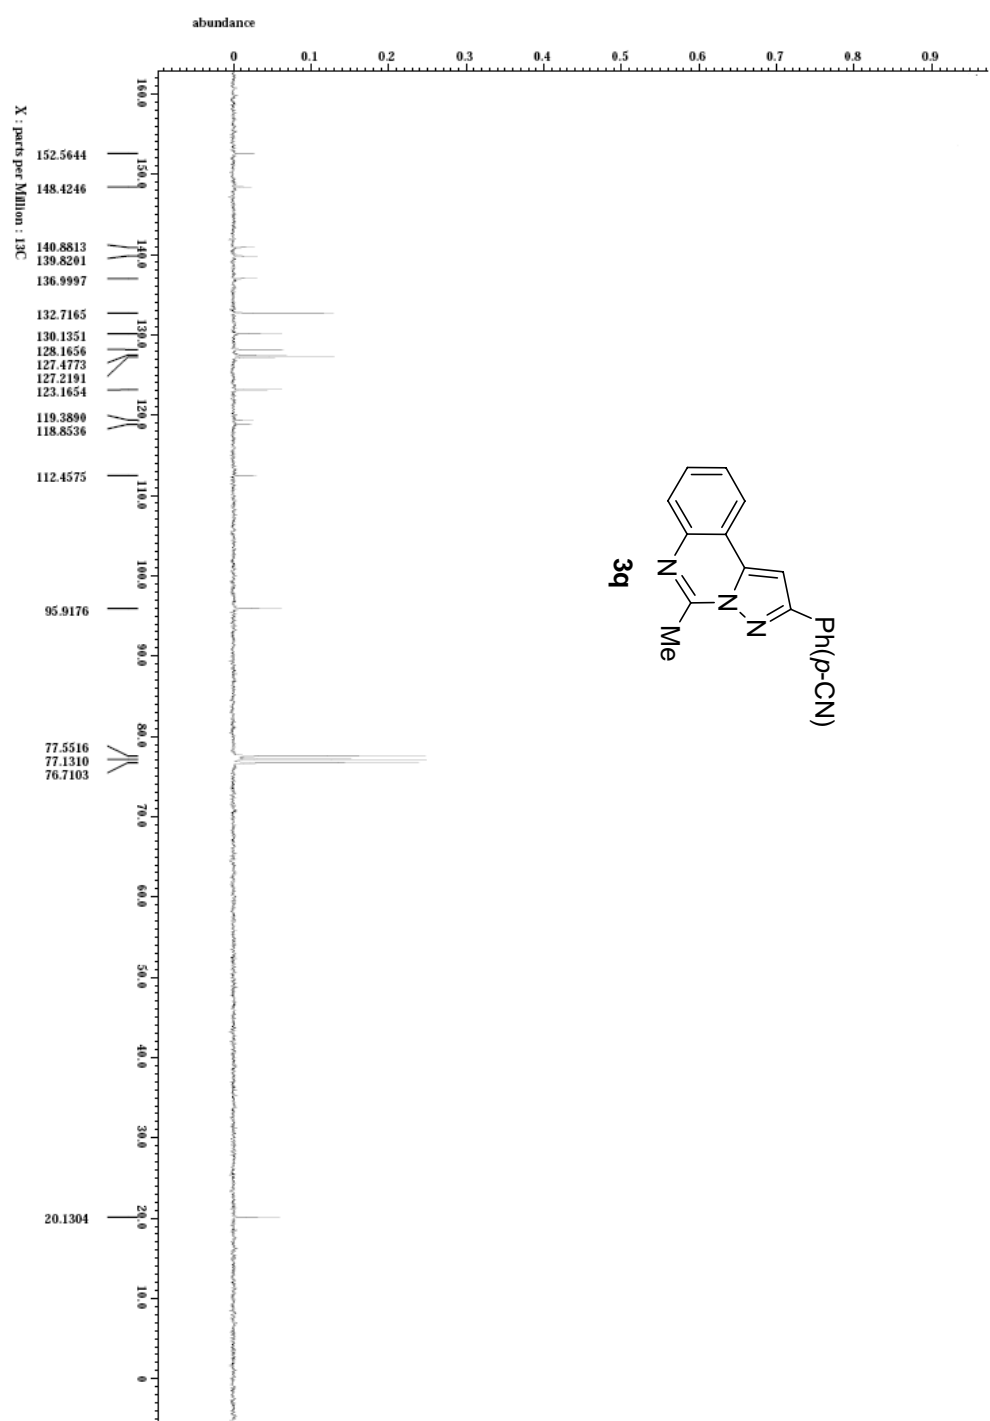

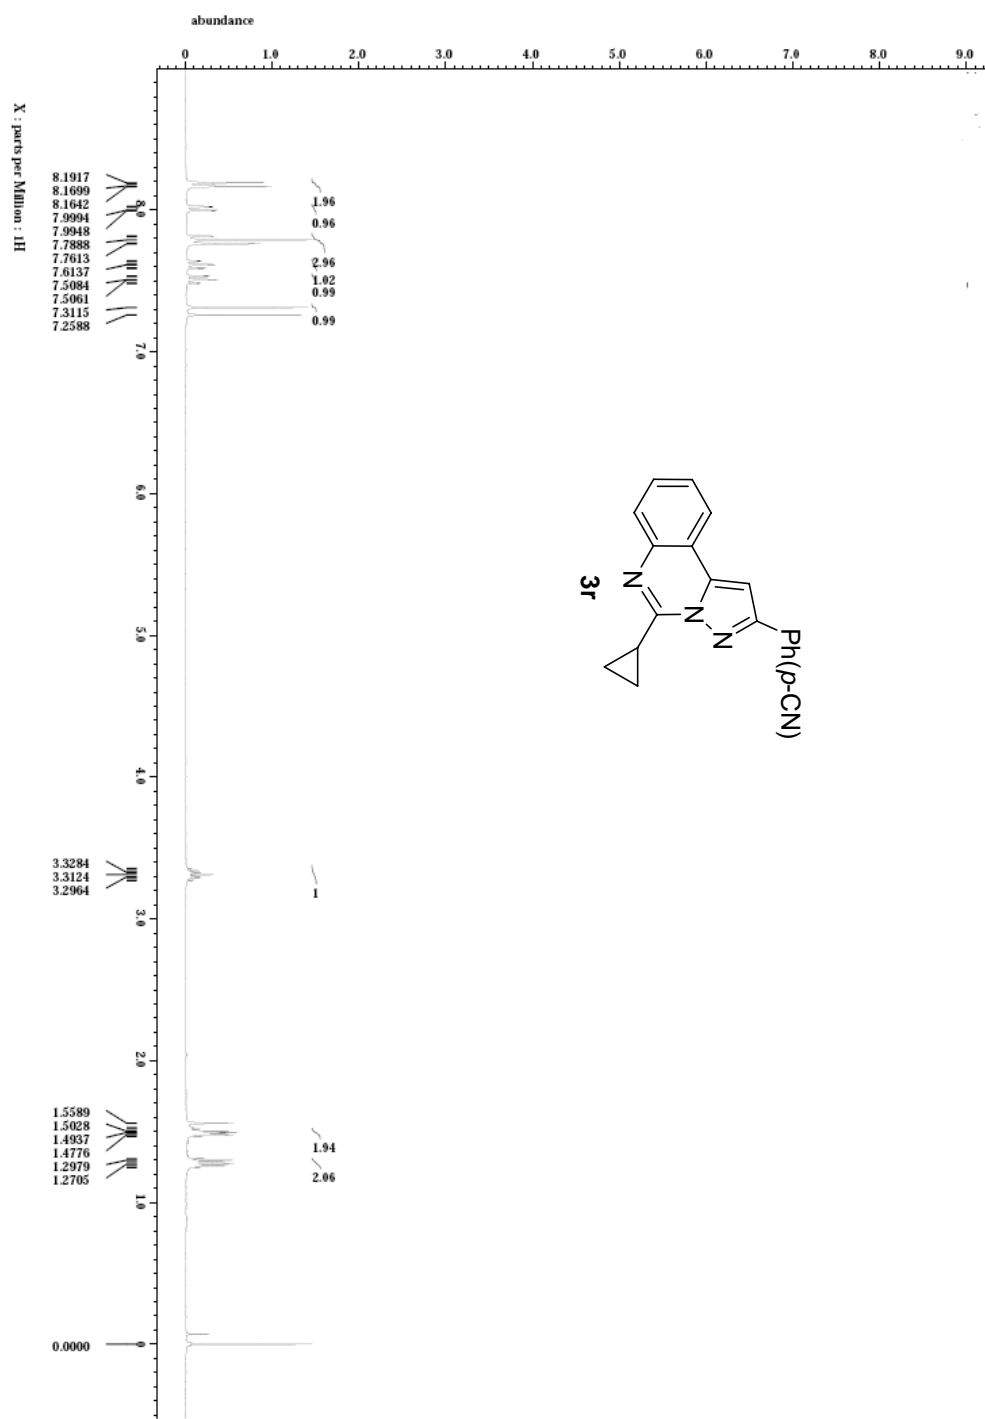

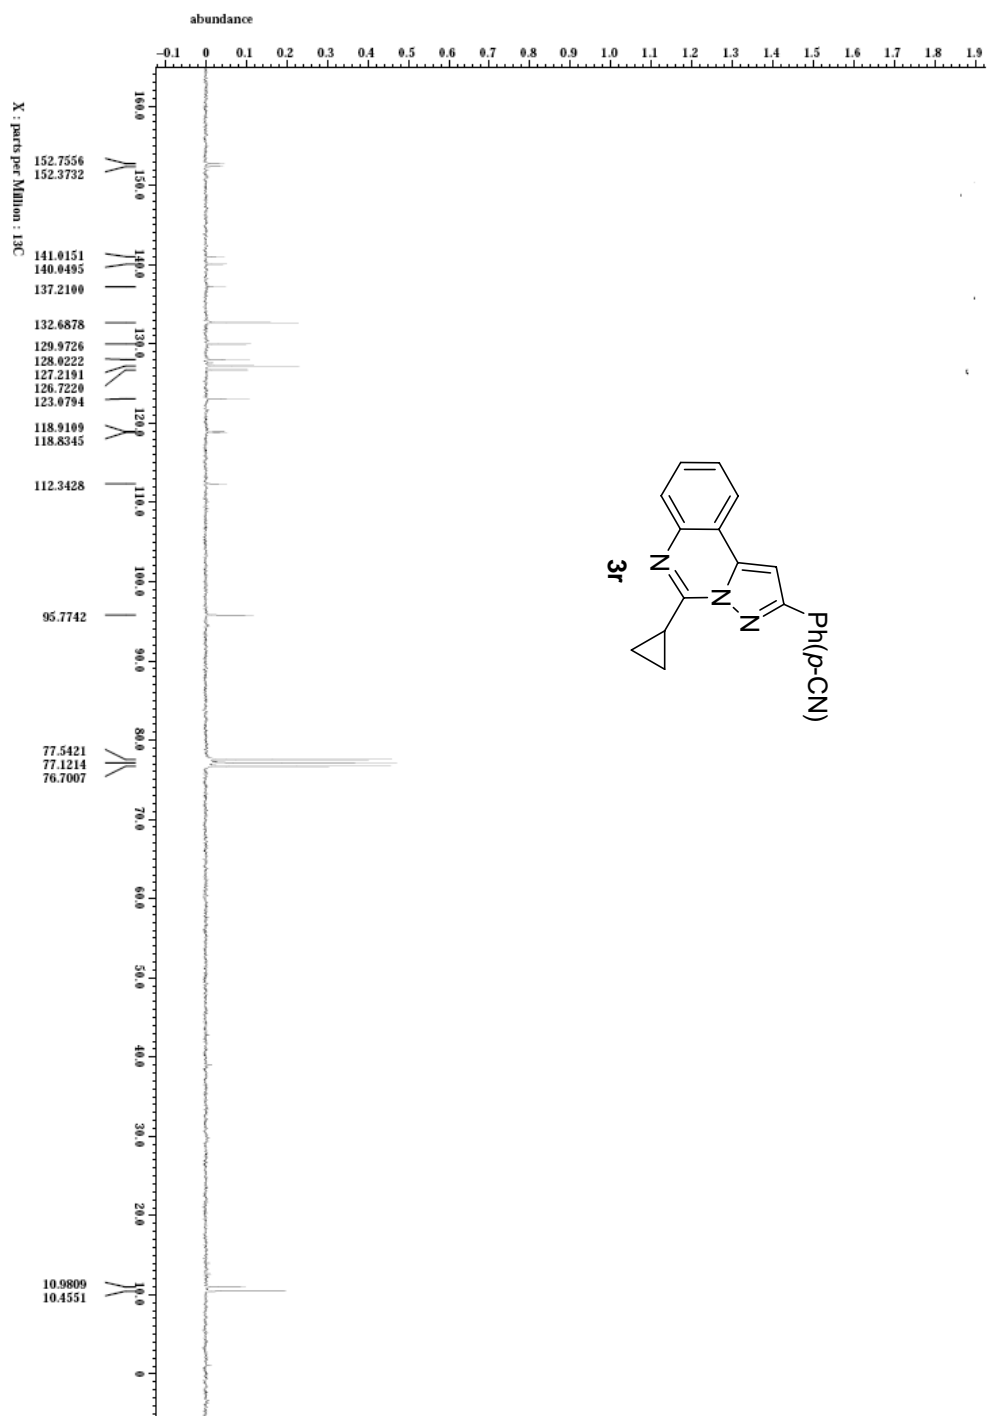

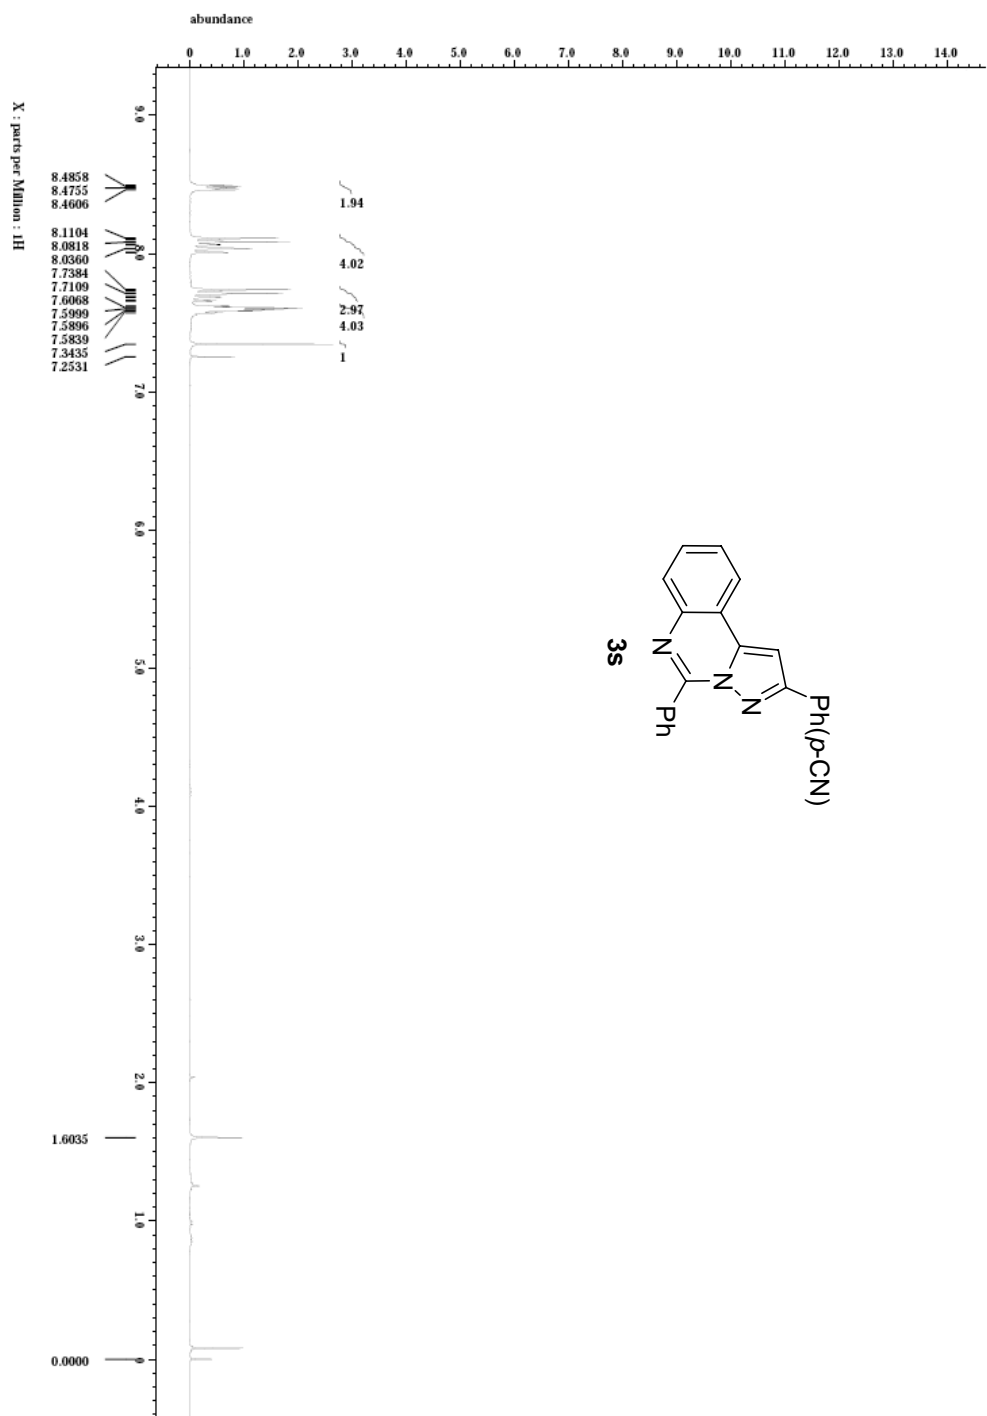

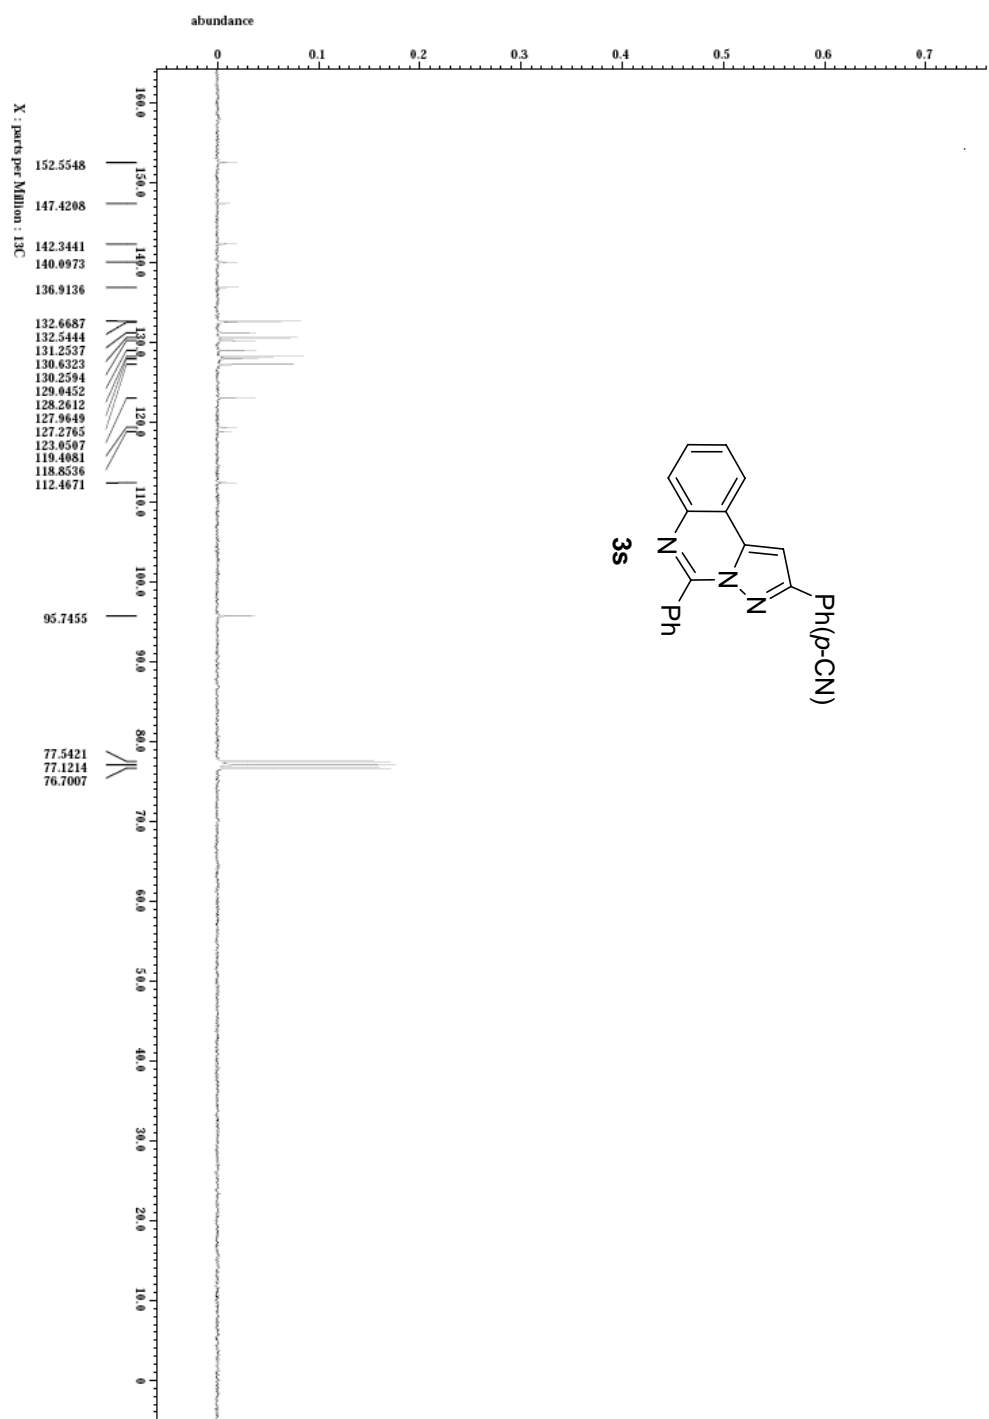

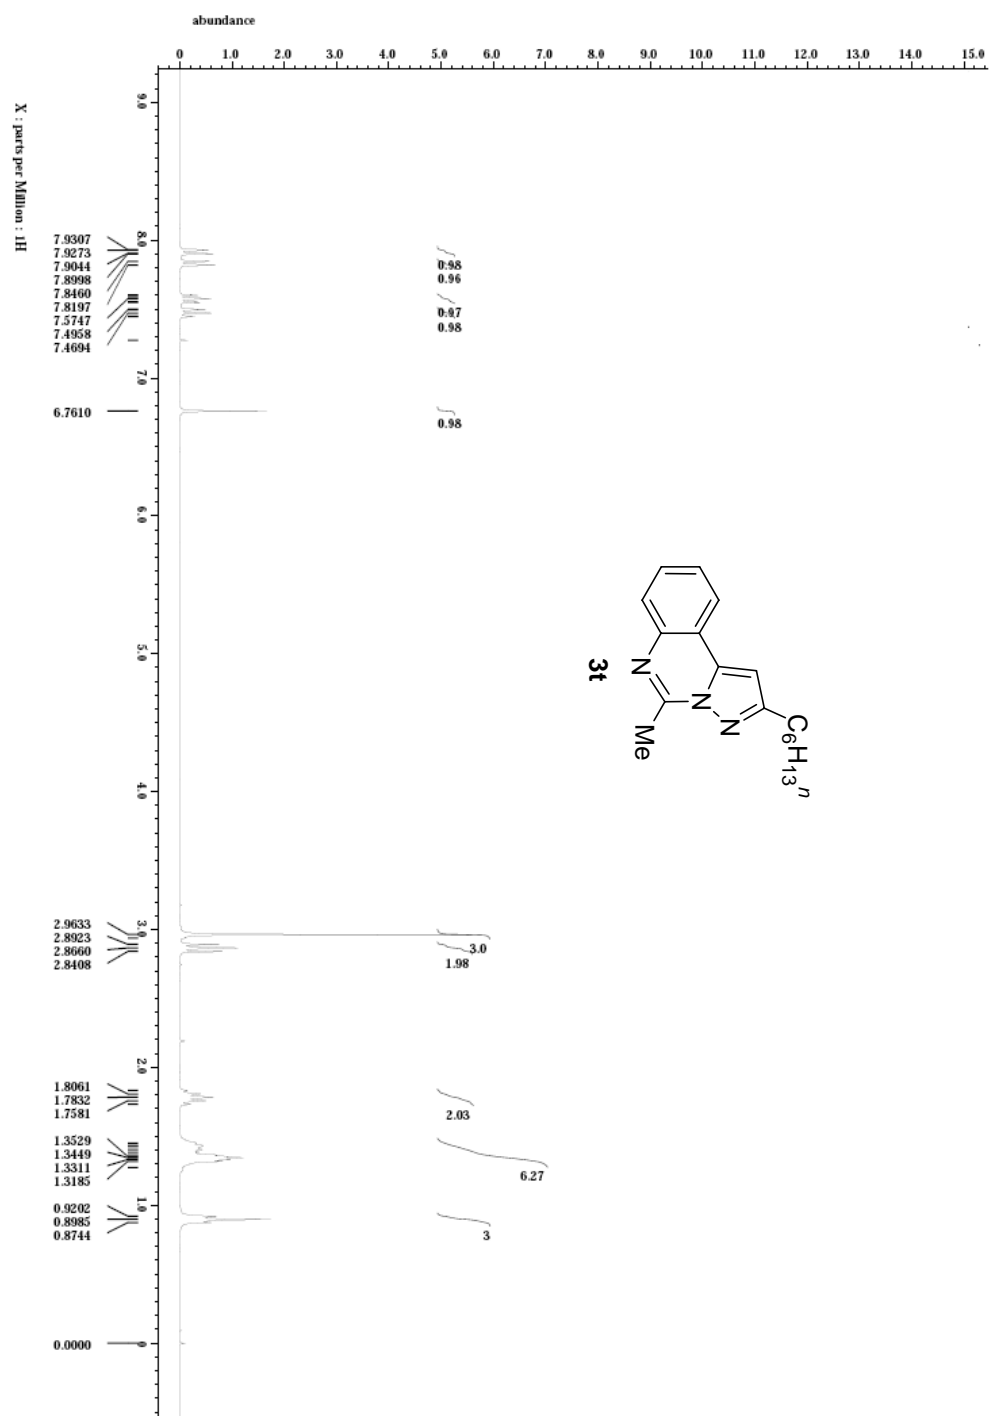



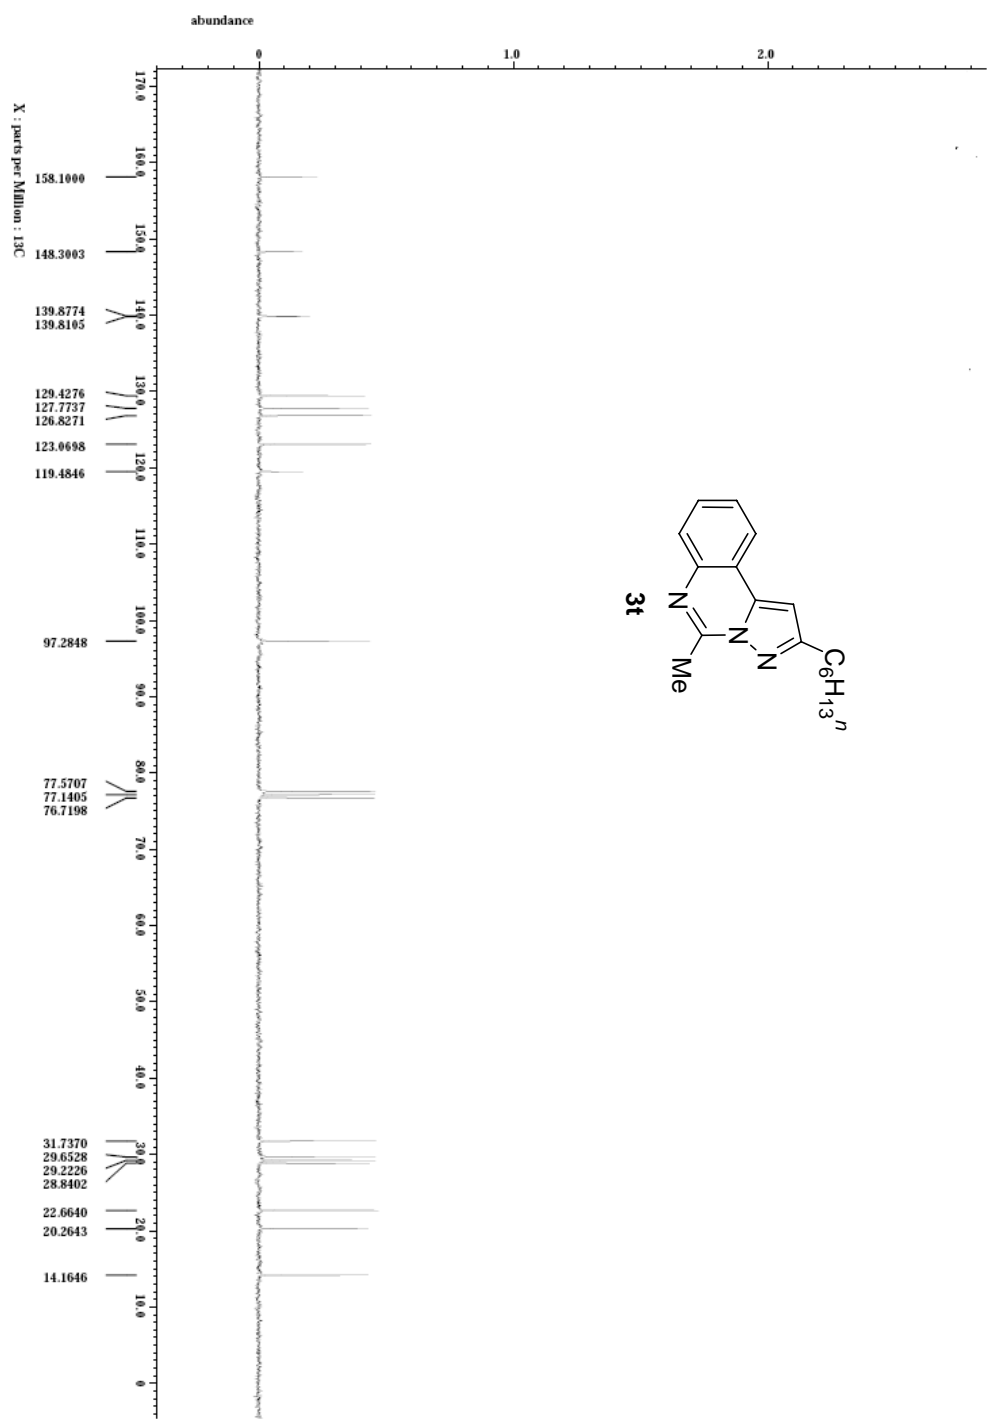

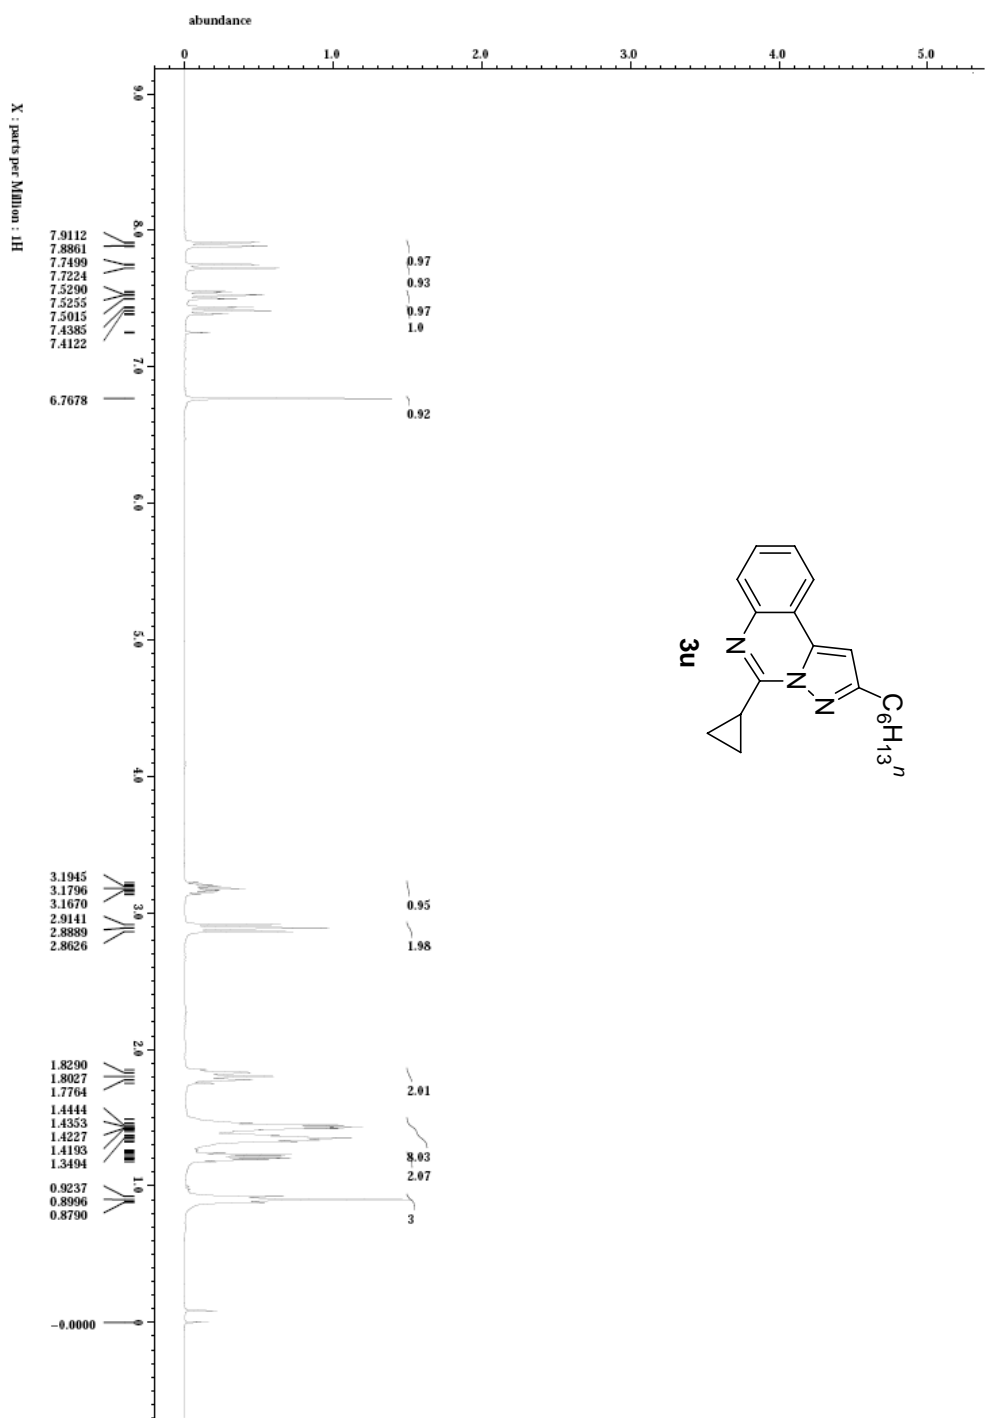

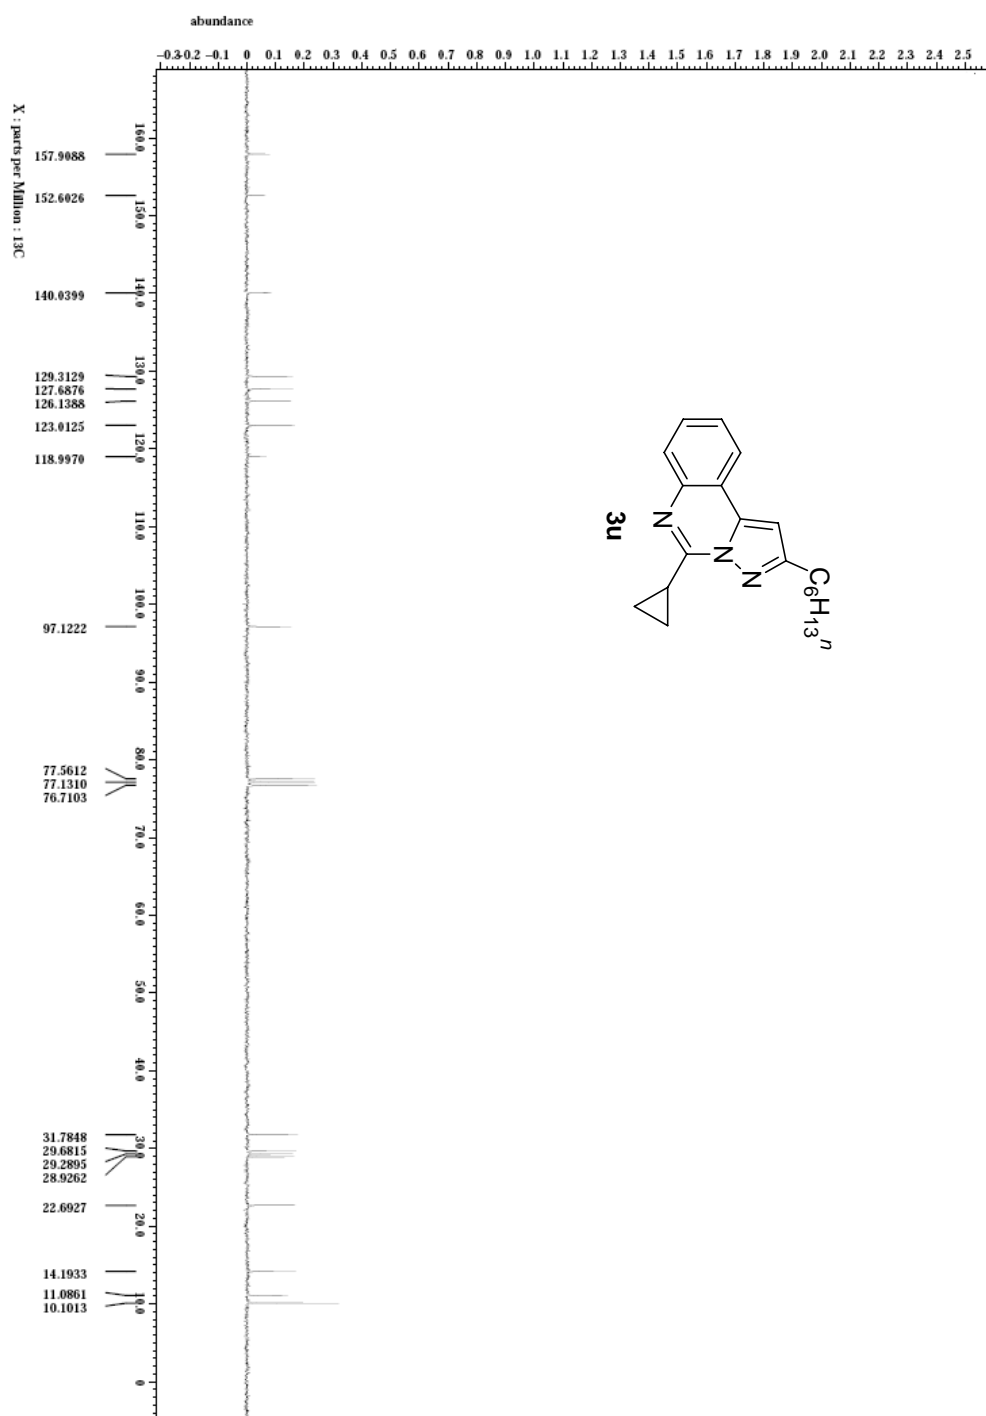

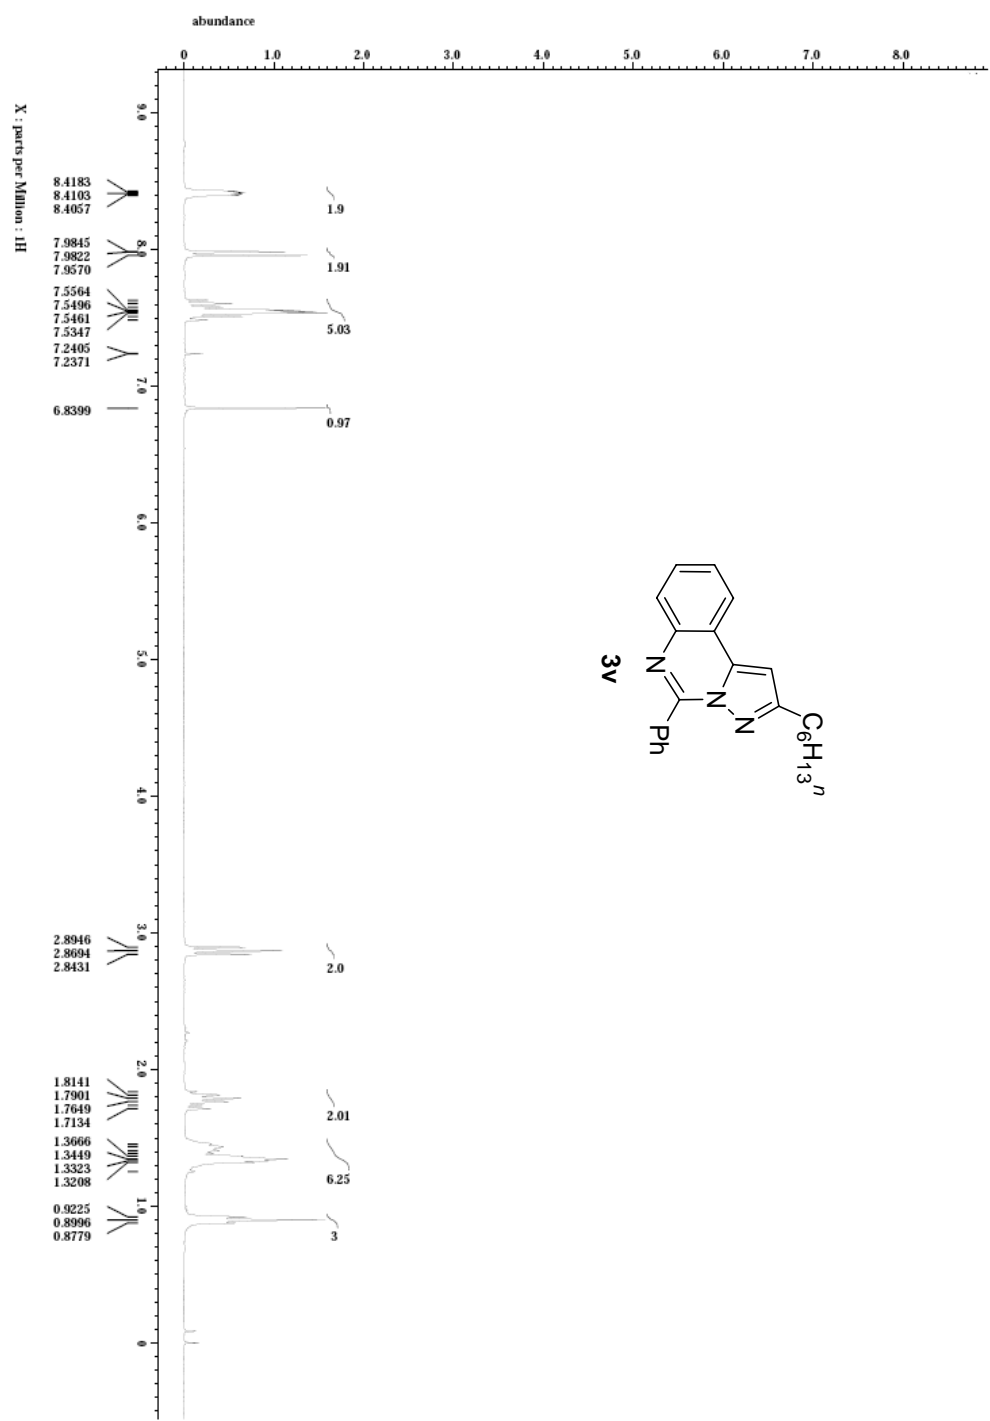

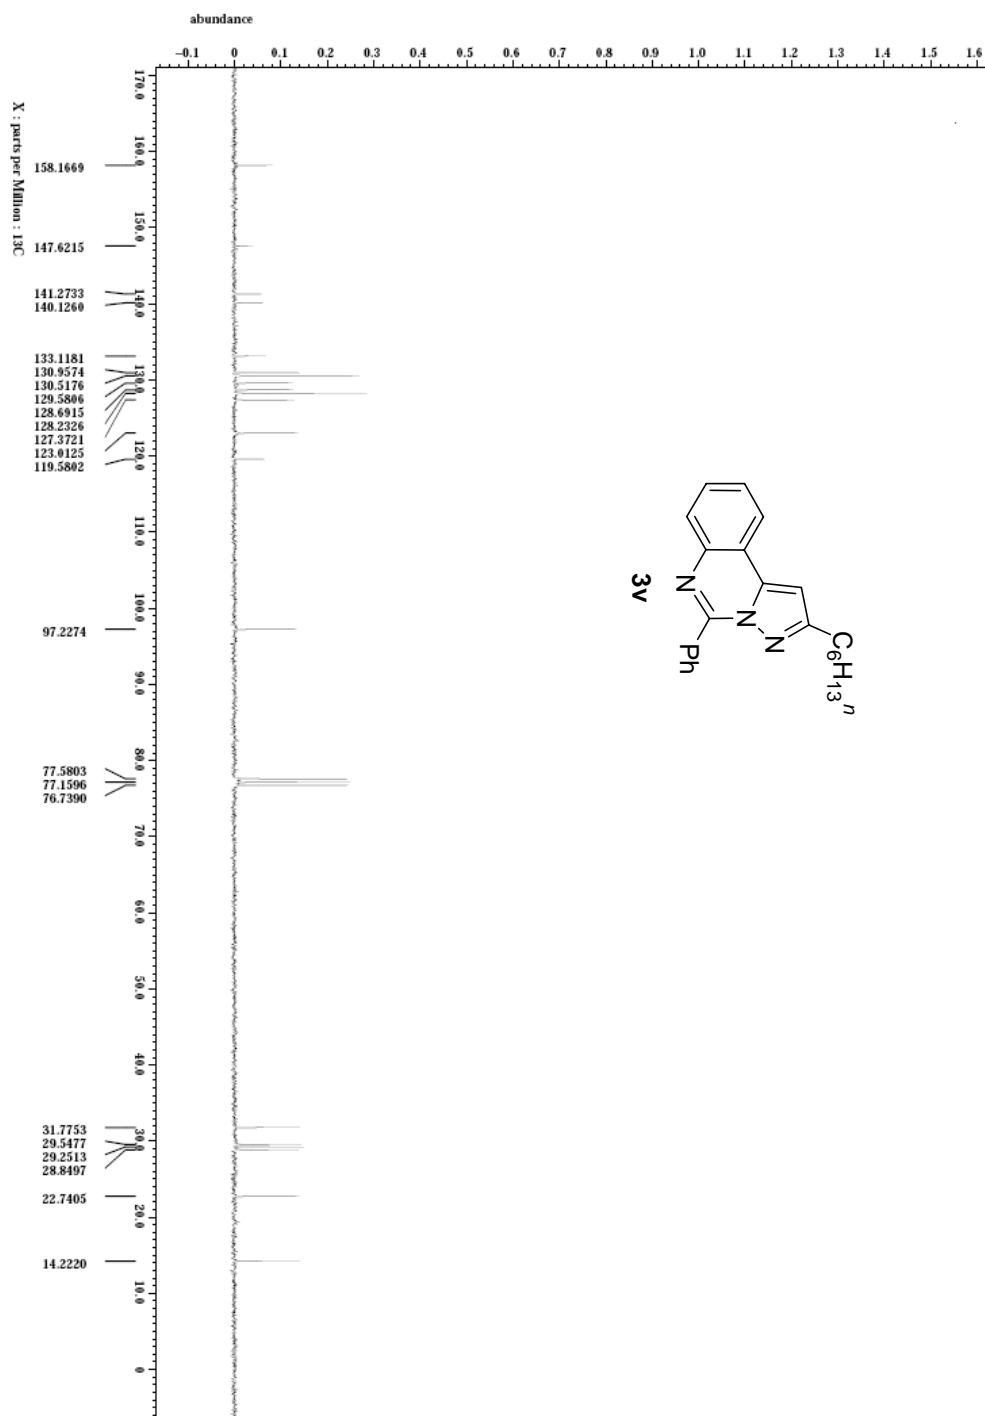

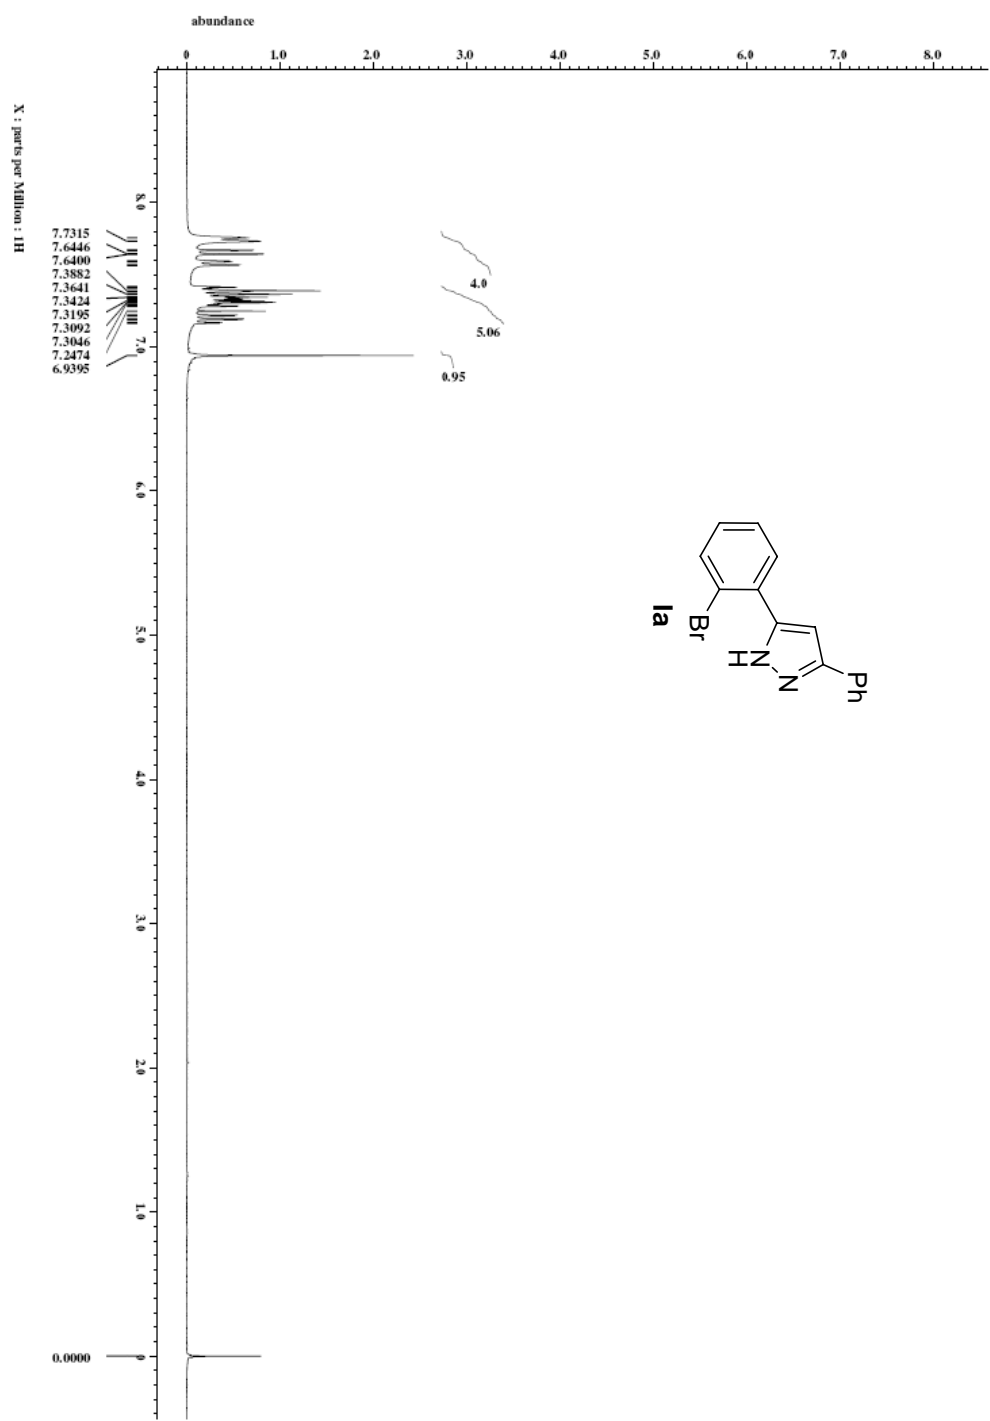

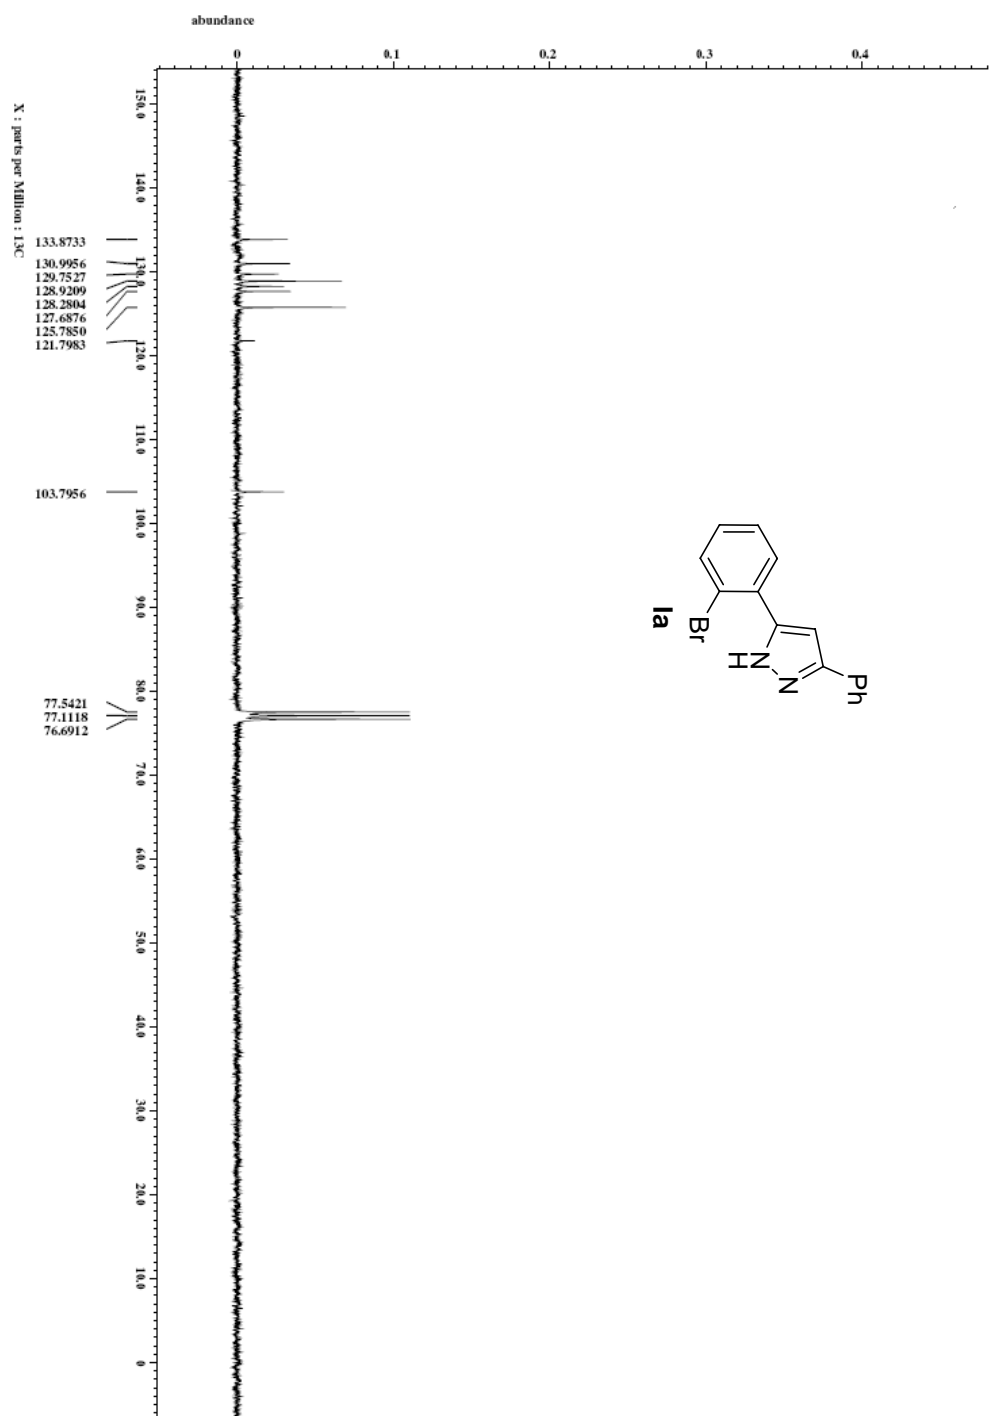

Supplement: c2ra21929h.pdf [file c2ra21929h.pdf]
